# Supplementary material
Source: PubMed Central journal article supplement (PMC8640838)
Supplement: mmc1.pdf [file mmc1.pdf]

# Life-Threatening and Non-Life-Threatening Complications Associated With Coughing

## A Scoping Review

*Richard S. Irwin, MD, Master FCCP; Natasha Dudiki, MD; and Cynthia L. French, PhD, FCCP; on behalf of the CHEST Expert Cough Panel*

CHEST 2020; 158(5):2058-2073

*Online supplements are not copyedited prior to posting and the author(s) take full responsibility for the accuracy of all data.*

© 2020 AMERICAN COLLEGE OF CHEST PHYSICIANS. Reproduction of this article is prohibited without written permission from the American College of Chest Physicians. See online for more details. DOI: 10.1016/j.chest.2020.06.012

**e-Appendix 1. Life-threatening and Non-life-threatening Complications Associated with Coughing: A Scoping Review**

Search Strings

PubMed search string: Cough/complications[Majr], Limits English OR For recent unindexed articles: cough[tiab] AND complications[tiab] NOT medline[sb], Limits English OR Cough complications with clinical conditions: cough[majr] AND (complication OR complications) AND (cardiovascular diseases[majr] OR gastrointestinal diseases[majr] OR urologic diseases[majr] OR nervous system diseases[majr] OR musculoskeletal diseases[majr] OR eye diseases[majr] OR psychosocial[tiab] OR quality of life[majr] OR respiration disorders[majr] OR skin diseases[majr]), Limits English.

SCOPUS search string: (coughing OR "chronic cough")) AND (INDEXTERMS("cardiovascular disease" OR "eye disease" OR "gastrointestinal symptom" OR "lung complication" OR "musculoskeletal disease" OR "neurologic disease" OR "psychosocial environment" OR "quality of life" OR "skin disease" OR "urogenital tract disease")) AND (INDEXTERMS(complication AND human)) AND (LIMIT-TO (LANGUAGE,"English")).

**e-Table 1. Online Data Supplement Contains 247 Studies Meeting Inclusion Criteria as Identified by the Literature Search**

| <i>Citation/<br/>year</i>         | <i>Study<br/>design</i> | <i>Cough Complication</i>                                                                                                                                     | <i>Setting of<br/>First Author</i> | <i>Age, Sex</i> | <i>N</i> |
|-----------------------------------|-------------------------|---------------------------------------------------------------------------------------------------------------------------------------------------------------|------------------------------------|-----------------|----------|
| <b>CARDIOVASCULAR</b>             |                         |                                                                                                                                                               |                                    |                 |          |
| Ahn et al. 2008. <sup>1</sup>     | Case Report             | Migration of implantable port catheter tip from right atrium to the right axillary vein                                                                       | Seoul, Korea                       | 64, M           | 1        |
| Aliyev et al. 2012 <sup>2</sup>   | Case Report             | Cough-induced sinus arrest resulting in recurrent episodes of syncope                                                                                         | Istanbul, Turkey                   | 32, M           | 1        |
| Baron et al, 1987 <sup>3</sup>    | Case Report             | Recurrent cough causing syncope due to AV block, Mobitz II                                                                                                    | Tucson, AZ                         | 34 M            | 1        |
| Bartel et al, 2008 <sup>4</sup>   | Case Report             | Paroxysmal coughing leading to closure device dislocation after percutaneous closure of secundum type atrial septal defect                                    | Innsbruck, Austria                 | 56 F            | 1        |
| Butman et al, 2010 <sup>5</sup>   | Case Report             | Cough induced stress cardiomyopathy                                                                                                                           | Cottonwood, Arizona                | 82, F           | 1        |
| Ceponis et al. 2017 <sup>6</sup>  | Case Report             | Cough associated with spontaneous arterial gas embolism in patient with chronic necrotizing pneumonia, bullae and brain infarct with death from complications | Durham, N.C. U.S.                  | 78, M           | 1        |
| Choi et al., 1989 <sup>7</sup>    | Case Report             | Cough induced sinus arrest and dizziness and syncope following a cold                                                                                         | Seoul, Korea                       | 63, M           | 1        |
| Cogbill et al., 1987 <sup>8</sup> | Case Report             | Injection port silastic catheter dislodgement caused by cough in patient with lymphoma and URI                                                                | La Crosse, Wisconsin               | 35, M           | 1        |
| Dubey et al., 2005 <sup>9</sup>   | Case Report             | Cough induced expulsion of peripherally placed central line in patient with multiple myeloma after URI                                                        | Patna, India                       | 35, M           | 1        |
| Hart et al., 1982 <sup>10</sup>   | Case Report             | Cough Induced complete atrioventricular block with ventricular asystole                                                                                       | London, England                    | 37, F           | 1        |

|                                        |             |                                                                                                                                                  |                            |                                  |   |
|----------------------------------------|-------------|--------------------------------------------------------------------------------------------------------------------------------------------------|----------------------------|----------------------------------|---|
| Herr et al., 1992 <sup>11</sup>        | Case Report | Vertebral artery dissection presenting as a posteroinferior cerebellar artery territory stroke                                                   | Salt Lake City, Utah       | 39, M                            | 1 |
| Irani et al., 1971 <sup>12</sup>       | Case Report | Inspiration- and cough- induced atrioventricular block                                                                                           | Hamilton, Ontario.         | 77, M                            | 1 |
| Ishii et al., 1987 <sup>13</sup>       | Case Report | Forced cough induced (during coronary angiography) idiopathic pneumopericardium                                                                  | Miyazaki prefecture, Japan | 31, M                            | 1 |
| Jacobs et al., 1991 <sup>14</sup>      | Case Series | Central venous (Port-a-Cath) catheter dislodgement due to coughing in 3 patients with cystic fibrosis and 1 with cancer                          | East Lansing, Michigan     | 15, M<br>26, M<br>18, M<br>67, M | 4 |
| Lee et al., 1999 <sup>15</sup>         | Case Report | Cough-induced heart block in patient with CAD                                                                                                    | Manhasset, New York        | 65, M                            | 1 |
| Littmann et al., 2002 <sup>16</sup>    | Case Report | Cough associated with Mobitz Type II AV block                                                                                                    | Charlotte, North Carolina  | 52, M                            | 1 |
| Maury et al., 2016 <sup>17</sup>       | Case Report | Cardiac luxation in ICU after coughing following right pneumonectomy                                                                             | Lyon, France               | 75, M                            | 1 |
| McIntyre et al., 2009 <sup>18</sup>    | Case Report | Cough induced AV inhibition and block causing pre-syncope                                                                                        | Ottawa, Ontario, Canada    | 73, F                            | 1 |
| Omori et al., 1984 <sup>19</sup>       | Case Report | Cough-induced tachyarrhythmia                                                                                                                    | Kyoto, Japan               | 57, M                            | 1 |
| Papadimos et al., 2006 <sup>20</sup>   | Case Report | Forceful cough secondary to partial obstruction of an airway by a foreign body followed by aortic dissection                                     | Toledo, Ohio               | 65, M                            | 1 |
| Reisin et al., 1994 <sup>21</sup>      | Case Report | Cough-induced non-sustained ventricular tachycardia                                                                                              | Ashkelon, Isreal           | 66, F                            | 1 |
| Ruckdeschel et al., 2016 <sup>22</sup> | Case Report | Cough-induced ventricular tachycardia in a patient with severe ischemic cardiomyopathy who underwent LVAD placement 1 year prior with recent URI | Aurora, CO, USA            | 69, M                            | 1 |
| Sivam et al., 2014 <sup>23</sup>       | Case Report | Spontaneous coronary artery (LAD) dissection associated with coughing in a patient with cystic fibrosis                                          | Camperdown, Australia      | 45, F                            | 1 |

|                                       |                                 |                                                                                                                                                                       |                               |                |   |
|---------------------------------------|---------------------------------|-----------------------------------------------------------------------------------------------------------------------------------------------------------------------|-------------------------------|----------------|---|
| Wu et al., 2005 <sup>24</sup>         | Case Report                     | Spontaneous migration of a Port-A-Cath into the ipsilateral jugular vein in patient with small cell lung cancer and severe cough                                      | Taipei, Taiwan                | 69, M<br>67, M | 2 |
| Yirerong et al., 2018 <sup>25</sup>   | Case Report                     | Excessive coughing associated with coronary artery dissection                                                                                                         | Warwick, Rhode Island         | UA, M          | 1 |
| <b>DERMATOLOGIC</b>                   |                                 |                                                                                                                                                                       |                               |                |   |
| Kravitz, 1979 <sup>26</sup>           | Case Report                     | Cough purpura (petechiae over both eyelids and cheeks) in children with repetitive cough                                                                              | Springfield, Virginia         | 3, UA<br>7, UA | 2 |
| Ramneesh et al., 2014 <sup>27</sup>   | Prospective Study               | Wound dehiscence in post-operative period secondary to cough                                                                                                          | Patiala, India                | UA             | 9 |
| Santarpino et al., 2013 <sup>28</sup> | Case Report                     | Sternal wound dehiscence from intense coughing secondary to aspiration while eating in an obese cardiac surgery patient                                               | Nuremberg, Germany            | 67, M          | 1 |
| Tseng et al., 2007 <sup>29</sup>      | Case Report                     | Left giant abdominal wall muscle layer hematoma following violent cough in patient with COPD                                                                          | Taichung, Taiwan              | 73, M          | 1 |
| <b>EAR, NOSE, THROAT</b>              |                                 |                                                                                                                                                                       |                               |                |   |
| Fenig et al., 2013 <sup>30</sup>      | Case report                     | Diagnosis thyroid cartilage fracture and associated phlegmon formation after a vigorous coughing spell in a patient recovering from a URI                             | Emergency Medicine, Bronx, NY | 47, M          | 1 |
| Nerurkar et al., 2012 <sup>31</sup>   | Case Report                     | Subluxated left arytenoid in the anterior position, asymmetry of bilateral vocal processes, obliteration of left cricoarytenoid space after a bout of severe coughing | Mumbai, Maharashtra, India    | 45, M          | 1 |
| <b>GASTROINTESTINAL</b>               |                                 |                                                                                                                                                                       |                               |                |   |
| Annunziata, 1996 <sup>32</sup>        | Case Report                     | Mallory Weiss tear caused by cough in toddler with URI                                                                                                                | Park Ridge Illinois, USA      | 13 mos, M      | 1 |
| Lee et al., 2009 <sup>33</sup>        | Case Report as Letter to Editor | Spontaneous rupture of gastroduodenal artery pseudoaneurysm following vigorous cough                                                                                  | Taipei, Taiwan                | 48, F          | 1 |
| Nensa et al., 2013 <sup>34</sup>      | Case Report                     | Esophageal wall rupture, hydropneumothorax and tension pneumothorax after heavy coughing attack                                                                       | Essen, Germany                | 68, M          | 1 |
| Park et al., 2018 <sup>35</sup>       | Retrospective review            | Severe cough induced lumbar hernia and rib fracture in patient with vocal cord cancer                                                                                 | Incheon, Korea                | UA, M          | 1 |

|                                           |                                     |                                                                                                                                                                                                   |                                    |          |    |
|-------------------------------------------|-------------------------------------|---------------------------------------------------------------------------------------------------------------------------------------------------------------------------------------------------|------------------------------------|----------|----|
| Sanjay et al., 2007 <sup>36</sup>         | Postal Survey                       | Cough identified by patients as the second most common predisposing factor for inguinal hernia                                                                                                    | Llantrisant, Wales, United Kingdom | UA, UA   | 20 |
| Sanyal et al., 1989 <sup>37</sup>         | Case Report                         | Percutaneous endoscopic gastrostomy button malfunction in patient severe cough                                                                                                                    | Richmond, Virginia.                | 66, M    | 2  |
| Sengar et al., 2008 <sup>38</sup>         | Case Report                         | Prolapse of the rectum with spontaneous rupture of the distal colon and evisceration of the small intestine through the anus in an infant after a bout of coughing and death due to complications | Delhi, India                       | 4 mos, F | 1  |
| Shutsha et al., 2003 <sup>39</sup>        | Case Report                         | Hepatic cyst rupture after a coughing fit                                                                                                                                                         | Gilly, Belgium                     | 67, F    | 1  |
| Stillman et al., 2015 <sup>40</sup>       | Case Report                         | Rectus sheath hematoma following violent coughing episodes associated with a URI in a patient on aspirin and NOAC                                                                                 | St. Joseph, Michigan               | 76, M    | 1  |
| Stupnik et al., 2008 <sup>41</sup>        | Case Report                         | Spontaneous rupture of a normal spleen after severe coughing 3 <sup>rd</sup> day post op following thoracic surgery for metastatic cancer                                                         | Ljubljana, Slovenia                | 76, F    | 1  |
| Toubia et al., 2005 <sup>42</sup>         | Case Report                         | Spontaneous rupture of a normal spleen secondary to cough associated with COPD exacerbation                                                                                                       | Oklahoma City, Oklahoma            | 56, F    | 1  |
| Ulla et al., 2001 <sup>43</sup>           | Case Report                         | Cough attack followed by gastric hemorrhage due to intussusception of a gastric fold into the orifice of the gastrostomy tube in a patient multiple sclerosis and recent respiratory infection    | Pontevedra, Spain                  | 48, M    | 1  |
| Vasquez et al., 1999 <sup>44</sup>        | Case Report                         | Traumatic abdominal wall hernia of portion of liver and small bowel caused by persistent cough in patient with COPD and multiple medical problems                                                 | San Diego, California              | 83, M    | 1  |
| Wehbe et al., 2008 <sup>45</sup>          | Case Report                         | Cough inducing spontaneous spleen rupture                                                                                                                                                         | Wichita, Kansas                    | 61, M    | 1  |
| Wergowske et al., 1983 <sup>46</sup>      | Case Report as letter to the editor | Splenic rupture from coughing in patient with bronchitis                                                                                                                                          | Dayton, Ohio                       | 44, F    | 1  |
| Won et al., 2012 <sup>47</sup>            | Case Report                         | Spontaneous splenic rupture associated with cough in patient with infectious mononucleosis                                                                                                        | Kogarah, Australia                 | 16, F    | 1  |
| Wurm Johansson et al., 2013 <sup>48</sup> | Case Report                         | Gastric perforation after coughing during upper endoscopy                                                                                                                                         | Malmö, Sweden                      | 76, F    | 1  |
| Weaver et al., 1969 <sup>49</sup>         | Retrospective Review                | Cardioesophageal lacerations (Mallory-Weiss Syndrome) with cough as the predisposing factor                                                                                                       | Salt Lake City, Utah               | UA, UA   | 2  |

| <b>GENITOURINARY</b>                 |                                         |                                                                                                                                                                                                                                                                                                         |                             |                |    |
|--------------------------------------|-----------------------------------------|---------------------------------------------------------------------------------------------------------------------------------------------------------------------------------------------------------------------------------------------------------------------------------------------------------|-----------------------------|----------------|----|
| Ben Safta et al, 2017 <sup>50</sup>  | Case Report                             | Strong cough leading to vaginal cuff dehiscence and evisceration of ileal loops in a patient being treated for cancer of the cervix                                                                                                                                                                     | Tunis, Tunisia              | 68, F          | 1  |
| Lee et al., 2000 <sup>51</sup>       | Prospective double-blind parallel study | Intolerable cough and cough-related urinary stress incontinence in diabetic postmenopausal women treated with ACE inhibitor                                                                                                                                                                             | Ping-Tung, Taiwan           | UA, F          | 20 |
| Reichman et al., 2016 <sup>52</sup>  | Cross sectional questionnaires study    | Stress urinary incontinence, with coughing in cystic fibrosis patients was the main cause for leakage (84% or 21/25). A quarter of the overall study population of 122 refrained from coughing up phlegm and from physiotherapy because of urine loss.                                                  | Brussels , Belgium          | 6-59, both M&F | 21 |
| Swenson et al., 2017 <sup>53</sup>   | Secondary Analysis                      | Greater stress urinary incontinence in obese woman associated with greater cough pressure (OR 3.191, 95% CI 1.326, 7.683; p < 0.01), obese women have higher resting intravesical pressure and also generate more pressure during maximal cough than women with BMI in the normal or overweight ranges. | Ann Arbor, Michigan         | UA, F          | 45 |
| <b>MUSCULOSKELETAL</b>               |                                         |                                                                                                                                                                                                                                                                                                         |                             |                |    |
| Abu-Gazala et al. 2013 <sup>54</sup> | Case Report                             | Cough-induced right costal margin rib fracture with separation of the ribs and diaphragmatic rupture resulting in abdominal visceral herniation into the thoracic cavity and subcutaneously                                                                                                             | Jerusalem, Israel           | 50, M          | 1  |
| Altman et al. 2007 <sup>55</sup>     | Case Report                             | Paroxysmal tussive episode causing rectus sheath hematoma in patient with a recent URI                                                                                                                                                                                                                  | New Orleans, Louisiana      | 45, F          | 1  |
| Anderton 1972 <sup>56</sup>          | Case Report as Letter to Editor         | Prolonged paroxysms of coughing leading to rectus abdominis muscle pulling of insertions over the pubic symphysis in patients with pulmonary coccidioidomycosis                                                                                                                                         | Yuma, Arizona               | UA             | 2  |
| Ayers et al, 2002 <sup>57</sup>      | Case report                             | Cough causing rib fracture and intercostal hernia in patient with asthma                                                                                                                                                                                                                                | West Sussex, United Kingdom | 68, M          | 1  |

|                                         |             |                                                                                                                                                                                                                       |                                             |                         |   |
|-----------------------------------------|-------------|-----------------------------------------------------------------------------------------------------------------------------------------------------------------------------------------------------------------------|---------------------------------------------|-------------------------|---|
| Bayram et al, 2014 <sup>58</sup>        | Case Report | Heavy coughing causing rectus sheath hematoma                                                                                                                                                                         | İzmir, Turkey                               | 67, M                   | 1 |
| Begley et al, 1995 <sup>59</sup>        | Case Report | Episode of coughing causing transverse undisplaced fracture through the left first rib with recent respiratory infection                                                                                              | Dundonald, Northern Ireland, United Kingdom | 26, M                   | 1 |
| Bodenheimer, 1948 <sup>60</sup>         | Case Report | Cough causing 2 rib fractures in patient with recent URI                                                                                                                                                              | Shreveport, Louisiana                       | 67, M                   | 1 |
| Butensky et al, 2016 <sup>61</sup>      | Case Report | Cough causing rib 10 <sup>th</sup> and 11 <sup>th</sup> fractures and flank pseudo-hernia in patient with COPD                                                                                                        | New York, New York                          | 68, F                   | 1 |
| Chaar et al. 2008 <sup>62</sup>         | Case Report | Cough causing rib fractures and disruption of the cartilage at the costal margin with herniation of abdominal contents into the chest and across a gap between ribs into the subcutaneous tissue in patient with COPD | New Haven, Connecticut                      | 54, M                   | 1 |
| Cherian et al., 2018 <sup>63</sup>      | Case Report | Spontaneous right sided lung hernia between 8 <sup>th</sup> and 9 <sup>th</sup> rib laterally with intercostal muscle rupture after violent bout of coughing in patient with history of chronic bronchitis            | Houston, Texas                              | 61, M                   | 1 |
| Cosgun et al., 2015 <sup>64</sup>       | Case Report | Abdominal rectus sheath hematoma due to cough in elderly patient on antiplatelet therapy in patient with COPD and cor pulmonale                                                                                       | Yozgat, Turkey                              | 83, F                   | 1 |
| Daniel et al., 2008 <sup>65</sup>       | Case Report | Cough-induced left costal margin rib fracture with separation of the ribs and diaphragmatic rupture resulting in abdominal visceral herniation into the thoracic cavity and subcutaneously.                           | Coventry, United Kingdom                    | 70, M                   | 1 |
| De Luca et al., 2015 <sup>66</sup>      | Case Report | Lung herniation into the left pleura through previous incision after cough in a patient with a history of anterior mediastinotomy                                                                                     | Naples, Italy                               | 52, F                   | 1 |
| De Maeseneer et al., 2000 <sup>67</sup> | Case series | Rib fractures induced by coughing in patients                                                                                                                                                                         | Brussel, Belgium                            | 21, F<br>79, M<br>47, F | 3 |



|                                     |             |                                                                                                                                                                                                                                                                                                   |                            |       |   |
|-------------------------------------|-------------|---------------------------------------------------------------------------------------------------------------------------------------------------------------------------------------------------------------------------------------------------------------------------------------------------|----------------------------|-------|---|
| Dean et al., 2014 <sup>68</sup>     | Case Report | Acute 5 <sup>th</sup> rib fracture and chronic non-united 6 <sup>th</sup> and 7 <sup>th</sup> right rib fractures associated with repeated and hard cough in patient with cystic fibrosis                                                                                                         | Salt Lake City, Utah       | 37, M | 1 |
| Dearlove et al., 2004 <sup>69</sup> | Case Report | Air emphysema in the neck after energetic cough in a hospitalized child post op from excision of thyroglossal cyst                                                                                                                                                                                | Pendlebury, United Kingdom | 6, UA | 1 |
| Elango et al., 2018 <sup>70</sup>   | Case Report | Spontaneous rectus sheath hematoma due to cough on apixaban (DOAC) for atrial fibrillation with recent history of influenza                                                                                                                                                                       | Detroit, Michigan,         | 69, F | 1 |
| Fein, 1958 <sup>71</sup>            | Case Report | Repeated multiple fractures of ribs (6 through 9, right and left) induced by cough over multiple years in patient with bronchial asthma                                                                                                                                                           | San Antonio, Texas         | 65, M | 1 |
| Franco et al., 2004 <sup>72</sup>   | Case Report | Avulsion fracture of the inferior angle of the scapula with deflection of the fragment towards chest wall related to prolonged cough in a patient on chronic steroids with bone insufficiency                                                                                                     | Nice Cedex, France         | 47, M | 1 |
| George et al., 2000 <sup>73</sup>   | Case Report | 7 <sup>th</sup> and 8 <sup>th</sup> rib fractures at the posterior axillary line with avulsion at the costochondral junction and diaphragmatic rupture with bowel loops in the chest as a complication of violent cough in patient with asthma                                                    | Stony Brook, NY            | 61, M | 1 |
| Gradwohl et al., 1987 <sup>74</sup> | Case Report | Avulsion of the lesser trochanter of femur following an episode of severe coughing in a patient with esophageal cancer                                                                                                                                                                            | Omaha, Nebraska            | 64, M | 1 |
| Habib et al., 2010 <sup>75</sup>    | Case Report | Disruption of the costal margin between the 8 <sup>th</sup> and 9 <sup>th</sup> ribs and combined spontaneous left herniation of both the lung and bowel with subcutaneous emphysema, pneumothorax, pneumomediastinum, and pneumopericardium following an attack of acute bronchitis and coughing | Liverpool, United Kingdom  | 47, M | 1 |

|                                         |                                 |                                                                                                                                                                                                                                                      |                               |       |   |
|-----------------------------------------|---------------------------------|------------------------------------------------------------------------------------------------------------------------------------------------------------------------------------------------------------------------------------------------------|-------------------------------|-------|---|
| Han et al., 2005 <sup>76</sup>          | Case Report                     | Tear of the left lateral internal oblique muscle resulting from cough in patient with COPD and recent URI                                                                                                                                            | Seoul, South Korea            | 72, M | 1 |
| Heckman et al., 2018 <sup>77</sup>      | Case Report                     | Concurrent spontaneous subcutaneous emphysema in the neck, pneumomediastinum, and pneumorrhachis (air in spinal column) secondary to cough                                                                                                           | Jacksonville, Florida         | 20, M | 1 |
| Hillenbrand et al., 2006 <sup>78</sup>  | Case Report                     | Cough related stress fracture of the 9th right rib, with subcutaneous hematoma and hemothorax and traumatic rupture of the diaphragm and massive right lateral abdominal herniation in a patient with a chronic cough due to chronic bronchitis      | Ulm, Germany                  | 59, M | 1 |
| Hillman, 1982 <sup>79</sup>             | Case Report                     | Subcutaneous emphysema, mediastinal emphysema, and pneumoperitoneum in a patient coughing after inhaling soldering fumes                                                                                                                             | London, United Kingdom        | 23, M | 1 |
| Hjalmarsson, et al., 1993 <sup>80</sup> | Case Report as Letter to Editor | Subcutaneous emphysema, hemorrhage, and subcutaneous hematoma as a complication of cough induced left rib fracture after severe asthmatic attack                                                                                                     | Reykjavik, Iceland            | 61, M | 1 |
| Jabr et al., 2011 <sup>81</sup>         | Case Report                     | Spontaneous lateral abdominal wall hematoma in a patient with severe cough and COPD                                                                                                                                                                  | Dickson, TN                   | 37, M | 1 |
| Jang et al., 2015 <sup>82</sup>         | Case Report                     | Hematoma of the left lateral abdominal wall induced by rupture of the left 11th intercostal artery after severe cough                                                                                                                                | Incheon, South Korea          | 39, M | 1 |
| Kallay et al., 2000 <sup>83</sup>       | Case Report                     | Costal margin separation at 8 <sup>th</sup> costal cartilage with massive left diaphragmatic separation and rupture with loop of colon in left hemithorax due to coughing during asthma exacerbation in obese patient with long standing steroid use | Winston-Salem, North Carolina | 63, F | 1 |

|                                         |                                 |                                                                                                                                                                                                                     |                       |                                                    |         |
|-----------------------------------------|---------------------------------|---------------------------------------------------------------------------------------------------------------------------------------------------------------------------------------------------------------------|-----------------------|----------------------------------------------------|---------|
| Karabulut et al., 2014 <sup>84</sup>    | Case Report as Letter to Editor | Spontaneous retroperitoneal bleeding with extremely large hematoma after severe coughing due to acute bronchitis                                                                                                    | Antalya, Turkey       | 66, M                                              | 1       |
| Katrancioglu et al., 2015 <sup>85</sup> | Retrospective Review            | Spontaneous and multiple rib fractures in patients with severe cough with lung disease and/or osteoporosis                                                                                                          | Sivas, Turkey         | 34-77 (mean 55.91 +/- 12.20 years), and 7M (58.4%) | 12      |
| Kawahara et al., 1997 <sup>86</sup>     | Case Report and Case Series     | Multiple bilateral rib fractures associated with severe coughing due to acute bronchitis and case series of fractures 6th to 9th ribs with a slight predilection for the left side                                  | Fukui, Japan          | 27, M<br>UA, M5, F32                               | 1<br>37 |
| Khan et al., 2006 <sup>87</sup>         | Case Report                     | Transdiaphragmatic intercostal herniation (between 8 <sup>th</sup> and 9 <sup>th</sup> ribs) of liver, colon, small bowel and omentum anteriorly and subcutaneous herniation of lungs posteriorly in the same space | Mumbai, India         | 75, M                                              | 1       |
| Kodama et al., 2013 <sup>88</sup>       | Case Report                     | Cough-induced internal oblique hematoma in patient with gastroesophageal reflux related chronic cough                                                                                                               |                       | 73, F                                              | 1       |
| Kopcsanyi et al., 1969 <sup>89</sup>    | Case Series                     | Cough fracture in posterior axillary line between the respective insertions of two muscles in the middle third of the ribs in premature Infants                                                                     | Pecs, Hungary         | ±3 mos ,<br>M 2<br>F 5                             | 7       |
| Kosałka et al., 2016 <sup>90</sup>      | Case Report                     | Cough-induced lung intercostal (8 <sup>th</sup> space) hernia with large abdominal hematoma in patient with COPD exacerbation and death                                                                             | Cracow, Poland        | 73, M                                              | 1       |
| Kuczkowski et al., 2003 <sup>91</sup>   | Case Report as Letter to Editor | Postoperative cough-induced recurrence of spinal anesthesia in the parturient                                                                                                                                       | San Diego, California | 29, F                                              | 1       |
| Laitinen et al., 1954 <sup>92</sup>     | Case Report                     | Osteophytes of the ribs due to cough in patients treated for tuberculosis                                                                                                                                           | Helsinki, Finland     | 50, M<br>52, M                                     | 2       |

|                                          |                                                 |                                                                                                                                                                                                                                    |                            |                                 |     |
|------------------------------------------|-------------------------------------------------|------------------------------------------------------------------------------------------------------------------------------------------------------------------------------------------------------------------------------------|----------------------------|---------------------------------|-----|
| Litch, 1998 <sup>93</sup>                | Case Report                                     | Multiple cough induced stress fractures and arthropathy of the ribs at extreme altitude in climber                                                                                                                                 | Kathmandu, Nepal.          | UA, UA                          | 1   |
| Long, 1962 <sup>94</sup>                 | Case Series                                     | Stress fracture of ribs associated with pregnancy                                                                                                                                                                                  | Palo Alto, California      | UA, UA.                         | 9   |
| Lorin et al., 1978 <sup>95</sup>         | Case Report                                     | Fracture of right 4 <sup>th</sup> and 5 <sup>th</sup> ribs in psychogenic cough in a child                                                                                                                                         | New York, New York         | 11, F                           | 1   |
| Ma et al., 2003 <sup>96</sup>            | Retrospective Chart Review and Telephone Survey | Cough and asthma causing inguinal hernia                                                                                                                                                                                           | Taipei, Taiwan, ROC        | UA, UA                          | 163 |
| Macedo et al., 2013 <sup>97</sup>        | Case Series                                     | Cough-induced herniation of abdominal contents through the diaphragm and intercostal space (transdiaphragmatic intercostal hernia), associated with rib fracture                                                                   | São Paulo, Brazil          | 53, M<br>71, M<br>64, M         | 3   |
| Macias-Robles et al., 2005 <sup>98</sup> | Case series                                     | Giant hematoma in the rectus abdominis muscle while receiving standard prophylaxis against venous thromboembolism and low dose ASA for ischemic heart disease in elderly patients suffering cough attacks from bronchial infection | Aviles, Spain              | 75, M<br>79, F<br>80, M         | 3   |
| Nakanishi et al., 2010 <sup>99</sup>     | Case Report                                     | Diaphragmatic rupture, mediastinal shift, with the presence of small bowel loops in the right hemithorax and pleural effusion due to violent cough during tracheostomy for laryngeal cancer                                        | Hamamatsu, Japan           | 73, M                           | 1   |
| Maqsood et al., 2018 <sup>100</sup>      | Case Report                                     | Bilateral hemotympanum secondary to coughing during endobronchial ultrasound-guided transbronchial fine needle aspiration                                                                                                          | Birmingham, UK.            | 64, M                           | 1   |
| Mary Parks et al., 2019 <sup>101</sup>   | Retrospective Review                            | Rupture of the costal margin, rib fractures, and lung herniation due to severe coughing fit                                                                                                                                        | Nottingham, United Kingdom | X=62.5 years (range 47-76), M 9 | 9   |

|                                          |             |                                                                                                                                                                                                    |                                    |                |   |
|------------------------------------------|-------------|----------------------------------------------------------------------------------------------------------------------------------------------------------------------------------------------------|------------------------------------|----------------|---|
| Migeot et al., 2013 <sup>102</sup>       | Case Report | Extensive thoraco-cervico-facial subcutaneous emphysema, a pneumomediastinum, and a pneumorrhachis following episodes of violent coughing                                                          | Bruxelles, Belgium                 | 19, M          | 1 |
| Musher et al., 1995 <sup>103</sup>       | Case Report | Progressive fracture of ribs due to cough paroxysmal in patient with pertussis                                                                                                                     | Houston, Texas                     | 49, F          | 1 |
| Nelwan et al., 2017 <sup>104</sup>       | Case Report | Persistent coughing associated with spontaneous rectus sheath hematoma in patient with dengue fever                                                                                                | Jakarta, Indonesia                 | 58, F          | 1 |
| Oostendorp et al., 2018 <sup>105</sup>   | Case Report | Cough-induced nonunion rib fractures and pulmonary herniation in patient with pneumonia                                                                                                            | Amsterdam, The Netherlands         | 57, M          | 1 |
| Oren et al., 1988 <sup>106</sup>         | Case Report | Cough related stress injuries of the ribs                                                                                                                                                          | Kfar Saba, Israel                  | 35, F<br>36, F | 2 |
| O'Shea et al., 2012 <sup>107</sup>       | Case Report | Subcutaneous emphysema and a focal intercostal muscle defect in the 9 <sup>th</sup> intercostal space, with lung and pleural herniation in patient with recent lower respiratory tract infection   | Birmingham, United Kingdom         | 40, F          | 1 |
| Ozlu et al., 2012 <sup>108</sup>         | Case Report | Abdominal wall hematoma between the right internal oblique and external oblique muscles related to severe cough in a patient under antiaggregant and anticoagulant therapy and on an ACE inhibitor | Bolu, Turkey                       | 56, F          | 1 |
| Papanikitas et al., 2008 <sup>109</sup>  | Case Report | Bilateral retrovascular femoral hernia related to cough in a patient with cystic fibrosis                                                                                                          | London United Kingdom              | 34, F          | 1 |
| Pareja Lopez et al., 2017 <sup>110</sup> | Case Report | Right intercostal artery bleeding between the 9 <sup>th</sup> and 10 <sup>th</sup> costal curvature with hemothorax and hematoma due to persistent cough in a case of acute exacerbation of COPD   | Murcia, Spain                      | 57, M          | 1 |
| Patel et al., 2016 <sup>111</sup>        | Case Report | Spontaneous rectus sheath hematoma secondary to severe coughing and bronchitis                                                                                                                     | Internal Medicine, New Jersey, USA | 62, F          | 1 |

|                                       |             |                                                                                                                                                                                                                                                             |                               |                                    |    |
|---------------------------------------|-------------|-------------------------------------------------------------------------------------------------------------------------------------------------------------------------------------------------------------------------------------------------------------|-------------------------------|------------------------------------|----|
| Paulley et al., 1949 <sup>112</sup>   | Case Series | Cough- induced rib fracture left side or left posterior axillary line (9, 10, 11 <sup>th</sup> ) in late pregnancy in both primipara and multipara                                                                                                          | London, United Kingdom        | 21, F<br>25, F<br>36, F<br>25, F   | 4  |
| Prasad et al., 2001 <sup>113</sup>    | Case Report | Cough induced 1 <sup>st</sup> rib fracture in patient with pertussis                                                                                                                                                                                        | New South Wales, Australia    | 11, M                              | 1  |
| Reper et al., 2012 <sup>114</sup>     | Case Report | Cough-induced rupture of the right diaphragm and abdominal herniation in patient with COPD                                                                                                                                                                  | Brussels, Belgium             | 49, M                              | 1  |
| Roberge et al., 1984 <sup>115</sup>   | Case Report | Multiple, bilateral rib fractures sustained during a paroxysm of coughing in patient with history of recent bronchitis                                                                                                                                      | New York, New York            | 72, F                              | 1  |
| Rogers et al., 1996 <sup>116</sup>    | Case Report | Large anterolateral defect in the left diaphragm, with a 9 <sup>th</sup> -rib fracture, with extensive herniation of intra-abdominal contents through the diaphragmatic defect into the subcutaneous space of the chest secondary to coughing in obese male | Burlington, Vermont           | 64, M                              | 1  |
| Sala et al., 2017 <sup>117</sup>      | Case Report | Right post-traumatic diaphragmatic hernia with dislocation of right upper abdominal viscera herniated into chest in a patient with cough and 20-year history of trauma                                                                                      | Milano, Italy                 | 41, M                              | 1  |
| Sano et al., 2015 <sup>118</sup>      | Case Series | Cough-induced single and multiple rib fractures                                                                                                                                                                                                             | Chigasaki, Japan.             | Med = 39.5 (14-86);<br>M 4<br>F 10 | 14 |
| Sternfeld et al., 1992 <sup>119</sup> | Case Report | Non-displaced fracture of the 6 <sup>th</sup> , 8 <sup>th</sup> , 9 <sup>th</sup> , and 10 <sup>th</sup> ribs on the left side and the 9 <sup>th</sup> rib on the right side in patient with persistent cough and post nasal drip                           | Rehovot, Israel               | 29, F                              | 1  |
| Warmington, 1966 <sup>120</sup>       | Case Series | Single and multiple rib fractures associated with cough                                                                                                                                                                                                     | Enniskillen, Northern Ireland | 54, M<br>68, M<br>24, F<br>32, M   | 4  |

|                                       |                                       |                                                                                                                                                                                           |                        |                      |     |
|---------------------------------------|---------------------------------------|-------------------------------------------------------------------------------------------------------------------------------------------------------------------------------------------|------------------------|----------------------|-----|
| Yeh et al., 2012 <sup>121</sup>       | Case Report                           | Cough-induced fracture of the left 7 <sup>th</sup> rib with callus formation in a healthy man with cough for 6 weeks                                                                      | Taipei, Taiwan, ROC    | 22, M                | 1   |
| Yu et al., 2006 <sup>122</sup>        | Case Report                           | Intercostal artery rupture that resulted in active hemorrhage and hematoma formation after violent coughing in an elderly hypertensive patient with URI                                   | Taichung, Taiwan, ROC  | 76, M                | 1   |
| <b>NEUROLOGIC</b>                     |                                       |                                                                                                                                                                                           |                        |                      |     |
| Aaronson et al, 1970 <sup>123</sup>   | Case Report                           | Cough Syncope                                                                                                                                                                             | Chicago, Illinois      | 41, M                | 1   |
| Ariturk et al 2012 <sup>124</sup>     | Case Report                           | Cough Syncope                                                                                                                                                                             | Diyarbakir, Turkey     | 59, M                | 1   |
| Awad et al 2001 <sup>125</sup>        | Case Report                           | Cough Syncope                                                                                                                                                                             | Nahariya, Israel       | 40, M                | 1   |
| Bahra et al, 1998 <sup>126</sup>      | Case Report                           | Cough headache                                                                                                                                                                            | London, United Kingdom | 72, F                | 1   |
| Benditt, et al., 2005 <sup>127</sup>  | Comparison of 3 groups clinical trial | Cough syncope patients exhibit more pronounced hypotension in response to cough than other fainters, and manifest an inappropriate cough-triggered blood pressure-heart rate relationship | Minneapolis, Minnesota | 64±7.1<br>M 7<br>F 3 | 9   |
| Berciano et al, 2007 <sup>128</sup>   | Case Report                           | Cough-induced paroxysmal cervico-brachial pain in patient with Chiari I and cervico-dorsal syringomyelia                                                                                  | Santander, Spain       | 54, F                | 1   |
| Buzzi et al, 2003 <sup>129</sup>      | Case Report                           | Cough causing headache in patient with Chiari I and syringomyelia                                                                                                                         | Rome, Italy            | 54, F                | 1   |
| Chadda et al. 1986 <sup>130</sup>     | Case Report                           | Cough syncope associated with sinus bradycardia and hypotension                                                                                                                           | Hyde Park, New York    | 74, M                | 1   |
| Chen et al. 2014 <sup>131</sup>       | Case Report                           | Syncope and convulsion induced by coughing in patient with paraspinal abscess                                                                                                             | Taipei, Taiwan, ROC    | 70, M                | 1   |
| Cordenier et al., 2013 <sup>132</sup> | Review                                | Cough headache, 400 primary and 300 secondary                                                                                                                                             | Brussel, Belgium       | UA, UA               | 700 |

|                                       |                                 |                                                                                                                                          |                             |                       |     |
|---------------------------------------|---------------------------------|------------------------------------------------------------------------------------------------------------------------------------------|-----------------------------|-----------------------|-----|
| Derbes et al., 1953 <sup>133</sup>    | Review of Literature            | Paroxysms of cough followed by fainting in patients with asthma (4 deaths in the series)                                                 | New Orleans, Louisiana      | UA, M, 281 F 9        | 290 |
| Dickinson et al., 2012 <sup>134</sup> | Case Report                     | Cough syncope induced vasodepressor hypotension                                                                                          | Minneapolis, Minnesota      | 44, M                 | 1   |
| Enamorado et al., 2015 <sup>135</sup> | Case Report                     | Acute appearance of carotid pseudoaneurysm with carotid artery dissection after coughing in anticoagulated patient with Bechet's Disease | Seville, Andalusia, Spain   | Adolescent, M         | 1   |
| Ertsey et al., 2000 <sup>136</sup>    | Case Report                     | Cough headache associated with Chiari type-I malformation                                                                                | Budapest, Hungary           | 48, F                 | 1   |
| Fitzsimons, 1998 <sup>137</sup>       | Case Report                     | Cough syncope resulting in car accident followed by temporary suspension of helicopter pilot duties                                      | Tacoma, Washington          | 41, M                 | 1   |
| Gelisse et al., 2008 <sup>138</sup>   | Case Report                     | Cough syncope and seizures                                                                                                               | Marseille, France           | 33, UA                | 1   |
| Gupta, 2005 <sup>139</sup>            | Case Report                     | Benign cough headache                                                                                                                    | Dubai, United Arab Emirates | 50 & 36, M            | 2   |
| Haslam et al., 1985 <sup>140</sup>    | Case Series                     | Cough syncope with epilepsy mimic in 5 in asthmatic Children                                                                             | Calgary, Alberta            | 1-16 (M=7.2), 7 M 5 F | 12  |
| Ireland et al., 1996 <sup>141</sup>   | Prospective descriptive study   | Cough Syncope in Arnold-Chiari I and II                                                                                                  | Rochester, New York         | 7-46, M 2 F 7         | 9   |
| Ishizuka et al., 2000 <sup>142</sup>  | Case Report as Letter to Editor | Cough syncope in dysphagic patient                                                                                                       | Sendai, Japan               | 75, M                 | 1   |
| Jenkins et al., 1981 <sup>143</sup>   | Case Report                     | Cough syncope and extensive bilateral subconjunctival hemorrhages in a patient with adult whooping cough                                 | London, United Kingdom      | 38, M                 | 1   |
| Katz, 1970 <sup>144</sup>             | Case Series                     | Cough syncope in children with asthma                                                                                                    | Los Angeles, California     | 1-14, UA              | 10  |



|                                        |                                  |                                                                                                                           |                            |               |    |
|----------------------------------------|----------------------------------|---------------------------------------------------------------------------------------------------------------------------|----------------------------|---------------|----|
| Kau et al., 2008 <sup>145</sup>        | Case Report                      | Coughing during CT guided lung biopsy leading to air embolism and stroke                                                  | Klagenfurt, Austria        | 50, M         | 1  |
| Kerr et al, 1961 <sup>146</sup>        | Case Report                      | Cough syncope                                                                                                             | Syracuse, New York         | NA            | 18 |
| Krediet et al., 2008 <sup>147</sup>    | Case Report                      | Cough syncope                                                                                                             | Amsterdam, The Netherlands | 59 & 58, M    | 2  |
| Kreitmann et al., 2011 <sup>148</sup>  | Case Report                      | Cough syncope in patient with Visceral larva migrans with pulmonary involvement caused by <i>Toxocara canis</i> infection | Lens, France               | 7, M          | 1  |
| Kusuyama et al., 2009 <sup>149</sup>   | Case Report                      | Cough syncope and convulsions associated with sinus pause resolved with treatment for gastroesophageal reflux disease     | Himeji, Japan              | 52, M         | 1  |
| Lin et al., 2010 <sup>150</sup>        | Case Report                      | Sudden paraplegia preceded by vigorous coughing resulting in release of myxoma fragment and embolism                      | Taipei, Taiwan             | 63, M         | 1  |
| Lindegaard et al., 1977 <sup>151</sup> | Case Series age matched controls | Cough syncope                                                                                                             | Oslo, Norway               | UA, M         | 5  |
| Linzer et al., 1992 <sup>152</sup>     | Case Report                      | Cough syncope in patient with occlusion and or stenosis of carotid, vertebral and subclavian arteries                     | Boston, Mass.              | 50, M         | 1  |
| Mahawish, 2016 <sup>153</sup>          | Case Report                      | Cough-induced hemiparesis resulting in spinal cord compression in patient with cervical spine abnormalities               | Rotorua, New Zealand       | 67, F         | 1  |
| Marinella, 2004 <sup>154</sup>         | Case Report as Letter to Editor  | Cough syncope and resulting car crash and orthopedic injuries in patient with influenza                                   | Dayton, Ohio               | 45, M         | 1  |
| Mattle et al., 1995 <sup>155</sup>     | Case Series with controls        | Cough syncope                                                                                                             | Bern, Switzerland.         | 58, 57, 61, M | 3  |

|                                       |                                   |                                                                                                                                                                                                                                                                                                              |                           |                                  |    |
|---------------------------------------|-----------------------------------|--------------------------------------------------------------------------------------------------------------------------------------------------------------------------------------------------------------------------------------------------------------------------------------------------------------|---------------------------|----------------------------------|----|
| Maznyczka et al., 2010 <sup>156</sup> | Case Report                       | Cough syncope in patient with posterior cranial fossa lesion likely meningioma                                                                                                                                                                                                                               | Leicester, United Kingdom | 54, M                            | 1  |
| McCorry et al., 2004 <sup>157</sup>   | Case Series                       | Cough syncope in heavy goods vehicle drivers all resulting in serious traffic accidents and resulting in death of 2 drivers, serious injury in another driver and death in 2 pedestrians                                                                                                                     | Liverpool, United Kingdom | UA                               | 4  |
| McIntosh et al., 1956 <sup>158</sup>  | Observational Study with Controls | Cough syncope                                                                                                                                                                                                                                                                                                | Durham, North Carolina    | UA                               | 20 |
| Moncada et al., 1993 <sup>159</sup>   | Case Report                       | Benign cough headache presenting as a toothache                                                                                                                                                                                                                                                              | Los Angeles, California   | UA                               | 1  |
| Mereu et al., 2016 <sup>160</sup>     | Clinical Study                    | Cough syncope with and without resulting injury (1 head injury and 1 traffic accident)                                                                                                                                                                                                                       | Cagliari, Italy;          | 49.4+14, 26 M 3 F                | 29 |
| Nomura et al., 2004 <sup>161</sup>    | Case Report                       | Dissection of the vertebral artery, inducing Wallenberg's syndrome associated with persistent cough in patient with influenza                                                                                                                                                                                | Takamatsu, Japan          | 45, M                            | 1  |
| Ozge et al., 2005 <sup>162</sup>      | Cross-Sectional Study             | Cough headache, other cough complications were encountered in 25 patients. These were urgency incontinence (9 patients, 5.5%), subconjunctival hemorrhage (7 patients, 4.2%), umbilical hernia (6 patients, 3.6%), cardiac rhythm disturbances (2 patients, 1.2%) and unexplained vomiting (1 patient, 0.6%) | Mersin, Turkey            | 45.3 ± 12, M (15/32%) F (17/53%) | 32 |
| O'doherty, 1953 <sup>163</sup>        | Case Series                       | Tussive syncope and vertigo                                                                                                                                                                                                                                                                                  | Washington, D. C.         | 50, M 57, M 59, M 52, M 43, F    | 5  |
| Oertel et al., 2005 <sup>164</sup>    | Case Report                       | Tracheal injury with pneumomediastinum, pneumoretroperitoneum, cervical and thoracic subcutaneous emphysema, external pneumocephalus, and pneumorrhachis of the entire spinal canal from violent coughing                                                                                                    | Aachen, Germany           | 19, M                            | 1  |

|                                           |                                     |                                                                                                                                     |                           |                |    |
|-------------------------------------------|-------------------------------------|-------------------------------------------------------------------------------------------------------------------------------------|---------------------------|----------------|----|
| Pascual et al., 2008 <sup>165</sup>       | Prospective y clinical study        | Cough headache                                                                                                                      | Salamanca, Spain          | UA             | 68 |
| Pascual et al., 1996 <sup>166</sup>       | Retrospective chart review          | Cough headache                                                                                                                      | Santander, Spain          | UA             | 30 |
| Pavao Martins et al., 2017 <sup>167</sup> | Case Report                         | Cough headache                                                                                                                      | Lisbon, Portugal          | 55, M<br>64, F | 2  |
| Perini et al., 1998 <sup>168</sup>        | Case Report                         | Benign cough "cluster" headache.                                                                                                    | Vicenza, Italy.           | 57, M          |    |
| Peters, 1961 <sup>169</sup>               | Case Report                         | Tussive unconsciousness (tussive syncope was defined as never complete loss of consciousness, later definitions are different)      | Sodus, New York           | 53, M          | 1  |
| Puetz et al., 1995 <sup>170</sup>         | Case Report                         | Cough syncope secondary to gastroesophageal reflux required to take a leave from crane operating job                                | Milwaukee, Wisconsin      | 32, M          | 1  |
| Rao et al., 2006 <sup>171</sup>           | Retrospective Review and Interviews | Cough-induced hemiplegic migraine with Impaired consciousness in cystic fibrosis                                                    | Cleveland, Ohio           | 24, F<br>38, M | 2  |
| Salameh et al., 2011 <sup>172</sup>       | Case Report                         | Spontaneous dissection of cerebral arteries followed by re-dissection in a patient with cough in patient with post-acute bronchitis | Leipzig, Germany          | 44, M          | 1  |
| Sandford et al., 2015 <sup>173</sup>      | Case Report                         | Left vertebral artery dissection with acute left cerebellar infarct in a patient with violent cough                                 | Leicester, UK             | 59, M          | 1  |
| Sansur et al., 2003 <sup>174</sup>        | Before and after Clinical Trial     | Cough headache in patients with Chiari I with and without syringomyelia                                                             | Bethesda, Maryland        | UA             | 11 |
| Siclari et al., 2009 <sup>175</sup>       | Case Report                         | Bilateral carotid thrombus formation causing left hemispheric stroke after strenuous coughing due to mycoplasma pneumonia           | Lausanne, Switzerland     | 40, F          | 1  |
| Smith et al., 1993 <sup>176</sup>         | Case Report                         | Cough headache as presenting symptom of cerebral aneurysm                                                                           | San Francisco, California | UA, UA         | 1  |

|                                        |                         |                                                                                                                                                                                                                                  |                                                      |                                                                               |          |
|----------------------------------------|-------------------------|----------------------------------------------------------------------------------------------------------------------------------------------------------------------------------------------------------------------------------|------------------------------------------------------|-------------------------------------------------------------------------------|----------|
| Stern et al., 1988 <sup>177</sup>      | Cross-sectional study   | Cough headache                                                                                                                                                                                                                   | Cleveland, Ohio                                      | UA                                                                            | 93 (50%) |
| Strauss et al., 1984 <sup>178</sup>    | Case Report             | Atypical cough syncope in patient with stenoses of both common carotids and patent vertebral arteries.                                                                                                                           | Medicine, Department of Surgery, Seattle, Washington | 51, M                                                                         | 1        |
| Styczynski et al., 2008 <sup>179</sup> | Case Report             | Cough syncope in patient with internal jugular vein incompetence                                                                                                                                                                 | Warsaw, Poland                                       | 53, M                                                                         | 1        |
| Symonds, 1956 <sup>180</sup>           | Case Series             | Cough headache                                                                                                                                                                                                                   | London, United Kingdom                               | No organic disease n=21; X=55 (37-77), M 18 Organic disease. n=6 (50-63), F 6 | 27       |
| Takazawa et al., 2014 <sup>181</sup>   | Case Report             | Asymptomatic sinus arrest and post-hiccup cough syncope in a patient with medullary infarction                                                                                                                                   | Otaku, Tokyo;                                        | 78, F                                                                         | 1        |
| Tanaka et al., 1994 <sup>182</sup>     | Case Report             | Cough syncope with seizure                                                                                                                                                                                                       | Fukuoka, Japan                                       | 55, M                                                                         | 1        |
| Torrington et al., 1984 <sup>183</sup> | Case Report as a letter | Acute cervical radiculopathy and disc herniation following violent coughing                                                                                                                                                      | Boise, Idaho                                         | 44, F                                                                         | 1        |
| Tsai et al., 2014 <sup>184</sup>       | Case Report             | Cough-induced hemispheric transient ischemic attack in patient with occlusion of the left common and internal carotid arteries and an incomplete circle of Willis                                                                | Dallas, Texas                                        | 65, M                                                                         | 1        |
| Tsuji et al., 1989 <sup>185</sup>      | Case Report             | Spinal epidural emphysema following violent cough                                                                                                                                                                                | Toyama, Japan                                        | 15, M                                                                         | 1        |
| Ulyatt et al., 1991 <sup>186</sup>     | Case Report             | Cerebral air embolism associated with coughing resulting in likely tension pneumothorax, pneumopericardium, pneumomediastinum and air in fascial planes of the neck, in a trauma victim on a continuous positive airway pressure | Auckland, New Zealand                                | 22, UA                                                                        | 1        |

|                                         |             |                                                                                                                                                                                                                                                                                                          |                            |                |   |
|-----------------------------------------|-------------|----------------------------------------------------------------------------------------------------------------------------------------------------------------------------------------------------------------------------------------------------------------------------------------------------------|----------------------------|----------------|---|
| Vincent et al., 1988 <sup>187</sup>     | Case Report | Cough- induced syncope resulting in death in the setting of cor pulmonale and obstructive lung disease                                                                                                                                                                                                   | Brussels, Belgium          | 61, M          | 1 |
| Viticchi et al., 2013 <sup>188</sup>    | Case Report | Coughing attack associated with carotid artery dissection and stroke in a patient with pertussis                                                                                                                                                                                                         | Rome, Italy                | 57, M          | 1 |
| Waldmann et al., 2017 <sup>189</sup>    | Case Report | Cough syncope related to gastroesophageal reflux                                                                                                                                                                                                                                                         | Paris, France              | 42, M          | 1 |
| Williams, 1980 <sup>190</sup>           | Case Report | Cough headache due to cerebellar tonsil herniation                                                                                                                                                                                                                                                       | Smethwick, Warley, England | 27, F<br>31, F | 2 |
| Wolman, 1962 <sup>191</sup>             | Case Report | Anoxic cerebral damage following severe paroxysms of cough associated with pertussis                                                                                                                                                                                                                     | Sheffield, United Kingdom  | 9, F           | 1 |
| Yagi et al., 2009 <sup>192</sup>        | Case Report | Cough-induced nystagmus                                                                                                                                                                                                                                                                                  | Bunkyo-ku, Japan           | 59, F          | 1 |
| Zeng et al., 2013 <sup>193</sup>        | Case Report | Cough syncope associated with constrictive pericarditis                                                                                                                                                                                                                                                  | Chongqing, China           | 87, M          | 1 |
| <b>OPHTHALMOLOGIC</b>                   |             |                                                                                                                                                                                                                                                                                                          |                            |                |   |
| Castelnuovo et al., 2000 <sup>194</sup> | Case Report | Spontaneous compressive orbital emphysema (air in the orbit compressing the eyeball and the optic nerve) after a violent attack of coughing in patient found to have sphenoid bone dysplasia with dehiscence and a flap of mucosa covering one dehiscence allowing air to enter but not leave the orbit. | Pavia, Italy               | 15, M          | 1 |
| Fajgenbaum et al., 2018 <sup>195</sup>  | Case Report | Large bullous, predominantly inferior, serous retinal detachment acutely developed after a severe coughing fit in an eye with morning glory disc anomaly                                                                                                                                                 | London, United Kingdom     | 42, M          | 1 |
| Kashani et al., 2009 <sup>196</sup>     | Case Report | Valsalva retinopathy presenting with subhyaloid hemorrhage likely due to coughing in patient with hypertension and probable URI.                                                                                                                                                                         | London, United Kingdom     | 46, M          | 1 |
| Kwong et al., 2006 <sup>197</sup>       | Case Report | Transient cough-induced blindness in patient with temporal arteritis                                                                                                                                                                                                                                     | Edmonton, Canada           | 71, M          | 1 |

|                                       |                                 |                                                                                                                                                                                                                                                                                                                                                                                                                                                                                                                                                                                                                                                                                                                   |                                 |                                                           |    |
|---------------------------------------|---------------------------------|-------------------------------------------------------------------------------------------------------------------------------------------------------------------------------------------------------------------------------------------------------------------------------------------------------------------------------------------------------------------------------------------------------------------------------------------------------------------------------------------------------------------------------------------------------------------------------------------------------------------------------------------------------------------------------------------------------------------|---------------------------------|-----------------------------------------------------------|----|
| Marimuthu et al., 2017 <sup>198</sup> | Case Report as Letter to Editor | Subconjunctival hemorrhage following a bout of coughing in child with suspected congenital fibrinogen deficiency                                                                                                                                                                                                                                                                                                                                                                                                                                                                                                                                                                                                  | Puducherry, India               | 5, F                                                      | 1  |
| Marous et al., 2018 <sup>199</sup>    | Case Report                     | Coughing-induced suprachoroidal hemorrhage simulating melanoma                                                                                                                                                                                                                                                                                                                                                                                                                                                                                                                                                                                                                                                    | Great River, New York           | 54, F<br>68, F                                            | 2  |
| Reid et al., 2013 <sup>200</sup>      | Case Report                     | Bilateral periorbital ecchymosis (panda sign) following an exacerbation of asthma with severe coughing                                                                                                                                                                                                                                                                                                                                                                                                                                                                                                                                                                                                            | Elgin, United Kingdom           | 19, F                                                     | 1  |
| Rieger, 1996 <sup>201</sup>           | Case Report                     | Complete spontaneous "spectacle hematoma" after vigorous paroxysmal coughing                                                                                                                                                                                                                                                                                                                                                                                                                                                                                                                                                                                                                                      | Bad Hall, Austria.              | UA, UA                                                    | 1  |
| Shaikh et al., 2003 <sup>202</sup>    | Case Report                     | Spontaneous late postoperative trabeculectomy bleb leak after a severe bout of coughing in patients with multiple medical problems                                                                                                                                                                                                                                                                                                                                                                                                                                                                                                                                                                                | Buckinghamshire, United Kingdom | 73, M<br>82, M                                            | 2  |
| Romano, 1983 <sup>203</sup>           | Case Report as Letter to Editor | Cough during intraocular surgery causing loss of the eye                                                                                                                                                                                                                                                                                                                                                                                                                                                                                                                                                                                                                                                          | Gainesville, Florida            | UA, UA                                                    | 2  |
| <b>PSYCHOSOCIAL/QUALITY OF LIFE</b>   |                                 |                                                                                                                                                                                                                                                                                                                                                                                                                                                                                                                                                                                                                                                                                                                   |                                 |                                                           |    |
| Braido et al, 2006 <sup>204</sup>     | Observational study             | <p>Chronic cough patients reported significantly lower scores in 5 of 8 SF-36 domains: social functioning (<math>t=10.292</math>), physical role limitation (<math>t=9.667</math>), emotional role limitation (<math>t=7.712</math>), general health (<math>t=5.154</math>) and vitality (<math>t=4.426</math>).</p> <p>The greatest disabilities identified by the CCIQ were observed in the social relationship (58.33) domain, followed by sleep/concentration (54.26), mood (51.49) and daily activities (47.69). Sleep, disturbing the partner, and irritability were the three outstanding aspects, affecting 80% of patients. These results show that chronic cough has a high negative impact on HRQL</p> | Genoa, Italy                    | X=53.7 ± 11.7 (SD) years (range 23-86 years), Sex unclear | 95 |

|                                       |                                              |                                                                                                                                                                                                                                                                                                                                                                                                                                                                |                      |                                 |     |
|---------------------------------------|----------------------------------------------|----------------------------------------------------------------------------------------------------------------------------------------------------------------------------------------------------------------------------------------------------------------------------------------------------------------------------------------------------------------------------------------------------------------------------------------------------------------|----------------------|---------------------------------|-----|
| Deslee et al., 2016 <sup>205</sup>    | Multicenter Cross-Sectional Study            | Cough, assessed by the dedicated CASA-Q questionnaire in the 7 previous days, is independently associated with HRQoL impairment in COPD.                                                                                                                                                                                                                                                                                                                       | Reims, France        | 62 [56–69], M 128, F 50         | 178 |
| French et al., 2017 <sup>206</sup>    | Prospective Observational Longitudinal Study | With treatment for the causes of chronic cough, adverse cough psychosocial and physical quality of life impact, including urinary incontinence, and psychological symptoms could all be simultaneously improved as measured by CQLQ.                                                                                                                                                                                                                           | Worcester, MA        | X= 58.5 ± 11.1 (SD), M 25, F 55 | 80  |
| French et al., 1998 <sup>207</sup>    | Prospective Intervention Trial               | With successful treatment of chronic cough, the average (± SD) number of complaints decreased from 8.6 ± 4.8 to 1.9 ± 3.2 (P<.0001). Post treatment, 16 of the 29 adverse occurrences had significantly decreased as measured by ACOS. Associated with the decreases in adverse cough occurrences was a significant decrease in the patients' self-perceived health related dysfunction                                                                        | Worcester, MA        | X= 54±12 (SD), M 7, F 32        | 39  |
| Gaspole et al., 2017 <sup>208</sup>   | Longitudinal Study                           | Multivariate analysis revealed that breathlessness and cough, along with the severity of depression, were the only independent predictors of quality of life. Of those, dyspnea was the major predictor, accounting for nearly 71% of the variation within the model of total SGRQ score. Cough severity accounted for a further 5.7% of variation, while depression accounted for 3.5% of variation. Supports all 3 as targets for improving quality of life. | Melbourne, Australia | X=71.3±8.6 (SD), M 347, F 169   | 516 |
| Hrisanfow et al., 2013 <sup>209</sup> | Questionnaire survey                         | The present results, using the CCQ and the SF-12 questionnaires indicate that cough and urinary incontinence (cause undetermined) lead to poor quality of life (physical and mental) in women and men with chronic obstructive pulmonary disease. Women with incontinence had a significantly higher burden of cough quality of life symptoms, functional and mental state than did women without incontinence.                                                | Orebro, Sweden       | 50-75, M 337, F 391             | 728 |

|                                      |                             |                                                                                                                                                                                                                                                                                                                                                                                                                                                                                                                                                                                                                                                                                                                                                                                                                                                                                                                                        |                         |                                               |     |
|--------------------------------------|-----------------------------|----------------------------------------------------------------------------------------------------------------------------------------------------------------------------------------------------------------------------------------------------------------------------------------------------------------------------------------------------------------------------------------------------------------------------------------------------------------------------------------------------------------------------------------------------------------------------------------------------------------------------------------------------------------------------------------------------------------------------------------------------------------------------------------------------------------------------------------------------------------------------------------------------------------------------------------|-------------------------|-----------------------------------------------|-----|
| Newcombe et al., 2016 <sup>210</sup> | Before and after survey     | 16 highest impact of chronic cough physical, psychological and social scores from the CC-QoL include:<br>1. You hate your cough;<br>2. Coughing annoys you in past week 3; Your cough makes you feel frustrated 4; Your cough disturbs others; 5. You are annoyed by your cough doing activities; 6. Your chest or stomach pains bother you 7. Your cough makes you feel tired; 8. You are troubled sleeping at night because of cough 9; Your cough wakes you during night 10; You have trouble getting to sleep because of cough 11; Coughing up phlegm annoys you; 12. You find it difficult to do things because of cough 13; You feel uncomfortable because of cough;<br>14. Your chest feels bad; 15. Your cough annoys others;<br>16. You feel frustrated because you couldn't keep up with others.<br>Findings using various questionnaires indicate that chronic cough significantly impacts the quality of life of children. | Brisbane, Australia     | Median 10 years, IQR 8 – 12 years; M 65, F 65 | 130 |
| Petsios et al., 2009 <sup>211</sup>  | Observational Study         | Cough has a direct effect on asthmatic children's QoL. Cough appeared to affect QoL of 8-14 year olds more than other symptoms, especially in girls. In the 8-14 year age group, coughers reported lower QoL compared to their counterparts; moreover, cough was found to affect QoL more than other symptoms ( $p < 0.05$ in all domains).                                                                                                                                                                                                                                                                                                                                                                                                                                                                                                                                                                                            | Athens, Greece          | 4-14, UA                                      | 200 |
| Shirai et al., 2012 <sup>212</sup>   | Cross-Sectional Study       | GERD scales were negatively correlated with cough quality of life total scores (LCQ) ( $r = -0.43$ ), $P < .0001$ . In patients with controlled asthma, patients with GERD had a significantly impaired quality of life because of the cough that affected all health domains.                                                                                                                                                                                                                                                                                                                                                                                                                                                                                                                                                                                                                                                         | Hamamatsu, Japan        | 50 (17-78), M 8, F 14                         | 22  |
| Tashkin et al., 2017 <sup>213</sup>  | Randomized Controlled Trial | Cough-specific QoL was modestly impaired in patients with frequent cough (total LCQ score, $15.4 \pm 3.7$                                                                                                                                                                                                                                                                                                                                                                                                                                                                                                                                                                                                                                                                                                                                                                                                                              | Los Angeles, California | 52.9 $\pm 9.23$ (SD),                         | 87  |



|                                    |             |                                                                                                                                                                                                                                                                                                                             |                                   |                 |   |
|------------------------------------|-------------|-----------------------------------------------------------------------------------------------------------------------------------------------------------------------------------------------------------------------------------------------------------------------------------------------------------------------------|-----------------------------------|-----------------|---|
|                                    |             | (SD); normal range, 3-21 [higher scores indicate worse QoL]). Frequent cough occurs commonly in scleroderma-related interstitial lung disease, correlates with both the presence and severity of GERD and ILD at baseline, and declines in parallel with improvements in both ILD and GERD over a 2-year course of therapy. |                                   | Sex UA          |   |
| <b>RESPIRATORY</b>                 |             |                                                                                                                                                                                                                                                                                                                             |                                   |                 |   |
| Alves et al. 2012 <sup>214</sup>   | Case report | Cough as the trigger for pneumomediastinum, pneumothorax, pneumorrhachis and subcutaneous emphysema.                                                                                                                                                                                                                        | Santa Maria, Brazil               | 21, F           | 1 |
| Asenjo et al., 2015 <sup>215</sup> | Case report | Lung herniation through the left lower intercostal space laterally coughing in patient with COPD treated with CPAP                                                                                                                                                                                                          | Madrid, Spain                     | 60, M           | 1 |
| Benedict, 1961 <sup>216</sup>      | Case Report | Rupture of the bronchus associated with paroxysms of coughing during bronchoscopy                                                                                                                                                                                                                                           | Boston, MA                        | 62, F,<br>74, M | 2 |
| Bilir et al, 2014 <sup>217</sup>   | Case report | Pneumomediastinum, pneumopericardium and epidural pneumatosis following coughing spells in patient with asthma                                                                                                                                                                                                              | Rize, Turkey                      | 9, M            | 1 |
| Bundy et al, 1994 <sup>218</sup>   | Case report | Hydrothorax (large right pleural effusion) in a patient coughing while undergoing active peritoneal dialysis for renal failure                                                                                                                                                                                              | Portsmouth, Virginia              | 36, M           | 1 |
| Candas et al. 2015 <sup>219</sup>  | Case report | Development of bilateral chylothorax after simple cough                                                                                                                                                                                                                                                                     | Istanbul, Turkey                  | 65, F           | 1 |
| Chiba et al. 1995 <sup>220</sup>   | Case report | Subcutaneous emphysema extending from the skull base and face to the chest, mediastinum and spinal epidural space following severe coughing caused by acute bronchitis.                                                                                                                                                     | Tokyo, japan                      | 28, M           | 1 |
| Cho et al., 2018 <sup>221</sup>    | Case Report | Anteromedial arytenoid subluxation due to severe cough when eating peanuts                                                                                                                                                                                                                                                  | Minneapolis, Minnesota            | 35, M           | 1 |
| Chua et al., 2015 <sup>222</sup>   | Case report | Left-sided lung herniation through the 8 <sup>th</sup> intercostal space, with pulmonary and pleural contents                                                                                                                                                                                                               | Gold Coast, Queensland, Australia | 60, M           | 1 |

|                                    |                                         |                                                                                                                                                                                                                                                                                                                                                                                                                                                                                                                                                            |                          |                                     |    |
|------------------------------------|-----------------------------------------|------------------------------------------------------------------------------------------------------------------------------------------------------------------------------------------------------------------------------------------------------------------------------------------------------------------------------------------------------------------------------------------------------------------------------------------------------------------------------------------------------------------------------------------------------------|--------------------------|-------------------------------------|----|
|                                    |                                         | extending through the hernia into the left posterolateral chest wall associated with non-resolving cough                                                                                                                                                                                                                                                                                                                                                                                                                                                   |                          |                                     |    |
| Franco et al., 2019 <sup>223</sup> | Case report                             | Subcutaneous emphysema in neck and chest, left pneumothorax, and pneumomediastinum associated with a violent coughing in a patient with asthma                                                                                                                                                                                                                                                                                                                                                                                                             | Torrejon de Ardoz, Spain | 67, F                               | 1  |
| Hamid et al., 2018 <sup>224</sup>  | Case Report                             | Spontaneous posterolateral lung herniation between 7 <sup>th</sup> and 8 <sup>th</sup> rib, complicated by pneumothorax, severe subcutaneous emphysema, pneumomediastinum, and pneumopericardium associated with severe cough in a patient with COPD and steroid use                                                                                                                                                                                                                                                                                       | Abington, Pennsylvania   | 65, M                               | 1  |
| Irwin et al., 2006 <sup>225</sup>  | Prospective cross sectional controlled. | Compared to control subjects, there was minimal-to-moderate chronic inflammation in all coughers ( $p \leq 0.0004$ ) on bronchial biopsy                                                                                                                                                                                                                                                                                                                                                                                                                   | Worcester, MA            | X= 51.6<br>±11.9 SD<br>M 11<br>F 10 | 24 |
| Irwin et al., 1977 <sup>226</sup>  | Review                                  | Complications reported up to 1977: asymptomatic elevation of serum creatine phosphokinase to rupture of rectus abdominis muscles, rib fractures, pneumomediastinum, Pneumothorax, pulmonary emphysema, loss of consciousness, rupture of subconjunctival, nasal, and anal veins, bradycardia, second and third degree heart block, cough syncope, constitutional symptoms (insomnia, exhaustion, anorexia, vomiting, fever, headache), urinary incontinence, disruption of surgical wounds, irritation of normal laryngeal and tracheobronchial structures | Providence, RI           | UA, UA                              | UA |
| Kao et al., 2014 <sup>227</sup>    | Case report                             | Transdiaphragmatic intercostal hernia, small intestine inside the left chest cavity and a diaphragmatic defect in the left anterior diaphragm caused by violent coughing                                                                                                                                                                                                                                                                                                                                                                                   | Taichung City, Taiwan    | 73, M                               | 1  |

|                                     |                      |                                                                                                                                                                                                                                             |                             |                                               |    |
|-------------------------------------|----------------------|---------------------------------------------------------------------------------------------------------------------------------------------------------------------------------------------------------------------------------------------|-----------------------------|-----------------------------------------------|----|
| Kara et al., 2004 <sup>228</sup>    | Case Report          | Left diaphragmatic rupture with gastric fundus in left hemithorax and mediastinal shift complicated with lacerations of stomach and spleen caused by a violent cough in patient with pneumonia and COPD                                     | Manisa, Turkey              | 28, M                                         | 1  |
| Khayer, 2014 <sup>229</sup>         | Case Report          | Simple cough as a cause of subcutaneous and mediastinal emphysema in child with a URI                                                                                                                                                       | Dubai, United Arab Emirates | 3, F                                          | 1  |
| Mao et al., 2007 <sup>230</sup>     | Case Report          | Herniation of the right apical lung (cervical lung) with tracheal displacement to the left in a child with cough                                                                                                                            | Oakland, California         | 10, F                                         | 1  |
| Park et al., 2016 <sup>231</sup>    | Retrospective review | Cough as the most frequent factor for trigger for spontaneous pneumomediastinum                                                                                                                                                             | Suwon, Korea                | X= 22.7±13.2, M 67 (73.6%)                    | 14 |
| Patolia et al., 2012 <sup>232</sup> | Case Report          | Bilateral pneumothorax associated with coughing during bronchoscopy without biopsy                                                                                                                                                          | Brooklyn, New York          | 51, F                                         | 1  |
| Roe et al., 1967 <sup>233</sup>     | Case Series          | Pneumomediastinum in children with cough with a death reported                                                                                                                                                                              | Jinja, Uganda               | 6 mos, M<br>1, M<br>4, M<br>18 mos, M<br>9, M | 5  |
| Rousie et al., 2004 <sup>234</sup>  | Case Report          | Large laceration of the posterior tracheal wall with subcutaneous emphysema and huge pneumomediastinum and minor right pneumothorax after coughing while in recovery room post cataract surgery in a patient with extensive steroid use     | Liège, Belgium              | 67, F                                         | 1  |
| Rivara et al., 2008 <sup>235</sup>  | Case Report          | Fatal gas cerebral embolism after heavy coughing while using non-invasive ventilation (bilevel positive airway pressure) for fibrotic lung disease                                                                                          | Geneva, Switzerland,        | 78, M                                         | 1  |
| Roh et al., 2006 <sup>236</sup>     | Case Report          | Spontaneous longitudinal laceration of the posterior membranous cervical trachea associated with subcutaneous emphysema in the right lateral neck, retropharyngeal, and paraesophageal spaces, and upper mediastinum in a child with severe | Seoul, Korea                | 7, M                                          | 1  |

|                                           |                                         |                                                                                                                                                                                                                                        |                           |            |     |
|-------------------------------------------|-----------------------------------------|----------------------------------------------------------------------------------------------------------------------------------------------------------------------------------------------------------------------------------------|---------------------------|------------|-----|
|                                           |                                         | cough due to acute tracheobronchitis                                                                                                                                                                                                   |                           |            |     |
| Rydell et al., 1955 <sup>237</sup>        | Case Series                             | Pneumomediastinum secondary to coughing in an elderly patient with emphysema with death due to complications                                                                                                                           | Santa Barbara, CA         | 96, M      | 1   |
| Sayhan et al., 2008 <sup>238</sup>        | Case Report                             | Spontaneous pneumomediastinum following a paroxysm of cough due to a URI                                                                                                                                                               | Diyarbakir, Turkey        | 21, F      | 1   |
| Sheka et al., 1984 <sup>239</sup>         | Case Report                             | Anterolateral defect in the right 8 <sup>th</sup> interspace with lung herniation on expiration and fracture of the right eighth rib, and a pleural effusion after vigorous coughing                                                   | Brooklyn, New York        | Retired, M | 1   |
| Sloth-Nielsen et al., 1989 <sup>240</sup> | Case Report                             | Spontaneous intercostal pulmonary hernia between ribs 7 and 8 with subsegmental incarceration associated with vigorous coughing                                                                                                        | Aarhus, Denmark           | 70, M      | 1   |
| Sulaiman et al., 2006 <sup>241</sup>      | Case Report                             | Anterior fracture of the 9 <sup>th</sup> rib close to the costal margin, enlarged 8 <sup>th</sup> intercostal space, and herniation of the pulmonary parenchyma outside of the bony structure in an obese male with chronic bronchitis | Bron Cedex, France        | 57, M      | 1   |
| Tack et al., 2000 <sup>242</sup>          | Case Report                             | Intercostal muscle rupture with subcutaneous hematoma and lung herniation after a single cough                                                                                                                                         | Charleroi, Belgium        | 62, M      | 1   |
| Wang et al., 2010 <sup>243</sup>          | Case Report                             | Bilateral spontaneous pneumothorax, pneumomediastinum, and pneumopericardium and subcutaneous emphysema of the neck induced by coughing after exposure to concrete silicon dust                                                        | Lebanon, New Hampshire    | 26, M      | 1   |
| Young et al., 1991 <sup>244</sup>         | Cross sectional questionnaire interview | Cough perceived by patients as making asthma worse. Coughing exacerbated asthma in 78 patients (41.7%) whereas in 56 (29.9%) it brought relief. However, in 35 patients (18.7%) it had a divalent effect as sometimes                  | Edinburgh, United Kingdom | UD         | 187 |

|                                      |                                         |                                                                                                                                                                                                                                                                                                                                                                                               |                           |              |   |
|--------------------------------------|-----------------------------------------|-----------------------------------------------------------------------------------------------------------------------------------------------------------------------------------------------------------------------------------------------------------------------------------------------------------------------------------------------------------------------------------------------|---------------------------|--------------|---|
|                                      |                                         | it made their asthma worse and sometimes it made it better.                                                                                                                                                                                                                                                                                                                                   |                           |              |   |
| <b>DISEASE TRANSMISSION</b>          |                                         |                                                                                                                                                                                                                                                                                                                                                                                               |                           |              |   |
| Field et al., 2018 <sup>245</sup>    | CHEST Guideline and Expert Panel Report | "According to the World Health Organization (WHO), cough lasting $\geq 2$ weeks warrants investigation in resource-limited countries where the prevalence of TB is high, defined as $\geq 100$ in 100,000, because of the risks associated with delayed diagnosis to infected individuals and the risk of continued transmission to their contacts"                                           | Calgary, Alberta, Canada  |              |   |
| Lindsley et al., 2012 <sup>246</sup> | Clinical Study                          | When the subjects had influenza, an average of 63% of each subject's cough aerosol particle volume in the detection range was in the respirable size fraction (SD 22%), indicating that these particles could reach the alveolar region of the lungs if inhaled by another person. This enhancement in aerosol generation during illness may play an important role in influenza transmission | Morgantown, West Virginia | 18-22, M6 F3 | 9 |
| <b>LABORATORY TESTING</b>            |                                         |                                                                                                                                                                                                                                                                                                                                                                                               |                           |              |   |
| Wang et al., 2017 <sup>247</sup>     | Case Report                             | Increased 18F-FDG uptake in multiple muscles likely related to violent cough the night prior to PET/CT study in patient with lung cancer (false positive)                                                                                                                                                                                                                                     | Luzhou, Sichuan, China    | 69, F        | 1 |

Abbreviations: UA = unavailable; M=male; F=female; mos = months; URI = upper respiratory infection; AV – atrioventricular block; CAD = coronary artery disease; LVAD = left ventricular assist device; ICU = intensive care unit; LAD = left anterior descending; NOAC = novel oral anticoagulant; ACE = angiotensin converting enzyme; BMI = body mass index; DOAC = direct oral anticoagulant; ASA = aspirin; HRQoL = health-related quality of life; IQR = interquartile range; QoL = quality of life; GERD = gastroesophageal reflux disease; ILD = interstitial lung disease; SF-12 = 12 item short form questionnaire; SF-36 = 36 item short form questionnaire; SGRQ = Saint George’s Respiratory Questionnaire; ACOS = adverse cough outcome survey; CASA-Q = Cough and Sputum Assessment Questionnaire; CCIQ = Chronic Cough Impact Questionnaire; CCQ = Clinical COPD Questionnaire; CC-QoL= Chronic Cough-Specific QoL Questionnaire, CQLQ = Cough Quality of Life Questionnaire; LCQ = Leicester Cough Questionnaire; CPAP = continuous positive airway pressure; WHO = World Health Organization; SD = standard deviation; 18F-FDG = 18 F-fludeoxyglucose; PET = positron emission tomography; CT = computed tomography; F = female; M = male.

## REFERENCES:

1. Ahn KS, Yoo K, Cha IH, et al. Spontaneously migrated tip of an implantable port catheter into the axillary vein in a patient with severe cough and the subsequent intervention to reposition it. *Korean J Radiol.* 2008;9 Suppl:S81-84.
2. Aliyev F, Kilickesmez KO, Celiker C, et al. Cough-induced sinus arrest resulting in recurrent episodes of syncope: Is it really transient? *J Cardiovasc Med (Hagerstown).* 2012;13(7):468-470.
3. Baron SB, Huang SK. Cough syncope presenting as mobitz type ii atrioventricular block--an electrophysiologic correlation. *Pacing Clin Electrophysiol.* 1987;10(1 Pt 1):65-69.
4. Bartel T, Bonatti JO, Muller S. Device dislocation, probably due to paroxysmal coughing early after percutaneous closure of secundum type atrial septal defect. *Am J Cardiol.* 2008;101(4):548-549.
5. Butman SM. Coughing-induced stress cardiomyopathy. *Catheter Cardiovasc Interv.* 2010;76(3):388-390.
6. Ceponis PJ, Fox W, Taylor TD, et al. Non-dysbaric arterial gas embolism associated with chronic necrotizing pneumonia, bullae and coughing: A case report. *Undersea Hyperb Med.* 2017;44(1):73-77.
7. Choi YS, Kim JJ, Oh BH, et al. Cough syncope caused by sinus arrest in a patient with sick sinus syndrome. *Pacing Clin Electrophysiol.* 1989;12(6):883-886.
8. Cogbill TH, Keimowitz RM. Injection port silastic catheter dislodgement caused by tussive (cough) paroxysm. *Wis Med J.* 1987;86(11):21-22.
9. Dubey P, Prasad RR. Expulsion of a peripherally placed "central" line by coughing. *Anaesthesia.* 2005;60(2):208-209.
10. Hart G, Oldershaw PJ, Cull RE, et al. Syncope caused by cough-induced complete atrioventricular block. *Pacing Clin Electrophysiol.* 1982;5(4):564-566.
11. Herr RD, Call G, Banks D. Vertebral artery dissection from neck flexion during paroxysmal coughing. *Ann Emerg Med.* 1992;21(1):88-91.
12. Irani F, Sanchis J. Inspiration- and cough-induced atrioventricular block. *Can Med Assoc J.* 1971;105(7):735-736.
13. Ishii K, Koga Y, Araki K. Idiopathic pneumopericardium induced by forced coughing during coronary arteriography. *Jpn Circ J.* 1987;51(2):157-159.
14. Jacobs WR, Zaroukian MH. Coughing and central venous catheter dislodgement. *JPEN J Parenter Enteral Nutr.* 1991;15(4):491-493.
15. Lee D, Beldner S, Pollaro F, et al. Cough-induced heart block. *Pacing Clin Electrophysiol.* 1999;22(8):1270-1271.
16. Littmann L, Miller RF, Humphrey SS. "Cough drops". *J Cardiovasc Electrophysiol.* 2002;13(2):198.
17. Maury JM, Pasquer A, Koffel C, et al. Cardiac luxation in icu after coughing effort following right pneumonectomy. *Intensive Care Med.* 2016;42(6):1071-1072.
18. McIntyre WF, Green MS. Electrocardiographical clues to a mechanism of pre-syncope. *Cardiol J.* 2009;16(5):479-480.
19. Omori I, Yamada C, Inoue D, et al. Tachyarrhythmia provoked by coughing and other stimuli. *Chest.* 1984;86(5):797-799.
20. Papadimos TJ, Hofmann JP. Aortic dissection after forceful coughing. *Anaesthesia.* 2006;61(1):71-72.
21. Reisin L, Blaer Y, Jafari J, et al. Cough-induced nonsustained ventricular tachycardia. *Chest.* 1994;105(5):1583-1584.
22. Ruckdeschel ES, Wolfel E, Nguyen DT. A case of cough-induced ventricular tachycardia in a patient with a left ventricular assist device. *Card Electrophysiol Clin.* 2016;8(1):165-167.
23. Sivam S, Yozghatlian V, Dentice R, et al. Spontaneous coronary artery dissection associated with coughing. *J Cyst Fibros.* 2014;13(2):235-237.
24. Wu PY, Yeh YC, Huang CH, et al. Spontaneous migration of a port-a-cath catheter into ipsilateral jugular vein in two patients with severe cough. *Ann Vasc Surg.* 2005;19(5):734-736.
25. Yirerong JA, Hurlburt H. Spontaneous coronary artery dissection in a man with intense coughing spasms. *BMJ Case Rep.* 2018;2018.

26. Kravitz P. The clinical picture of "cough purpura," benign and non-thrombocytopenic eruption. *Va Med.* 1979;106(5):373-374.
27. Ramneesh G, Sheerin S, Surinder S, et al. A prospective study of predictors for post laparotomy abdominal wound dehiscence. *J Clin Diagn Res.* 2014;8(1):80-83.
28. Santarpino G, Pfeiffer S, Concistre G, et al. Sternal wound dehiscence from intense coughing in a cardiac surgery patient: Could it be prevented? *G Chir.* 2013;34(4):112-111.
29. Tseng CK, Tseng YC, Chen WK, et al. A rare complication of cough. *Intern Med.* 2007;46(15):1269-1270.
30. Fenig M, Strasberg S, Cohen JC, et al. Laryngeal fracture after coughing. *Am J Emerg Med.* 2013;31(9):1421 e1421-1423.
31. Nerurkar N, Chhapola S. Arytenoid subluxation after a bout of coughing: A rare case. *Am J Otolaryngol.* 2012;33(2):275-278.
32. Annunziata GM, Gunasekaran TS, Berman JH, et al. Cough-induced mallory-weiss tear in a child. *Clin Pediatr (Phila).* 1996;35(8):417-419.
33. Lee CH, Lan CC, Wang CC, et al. Spontaneous rupture of gastroduodenal artery pseudoaneurysm following vigorous cough. *Am J Gastroenterol.* 2009;104(2):529-530.
34. Nensa F, Stylianou E, Schroeder T. Progressive dyspnea after a heavy coughing attack. *Gastroenterology.* 2013;144(3):e9-e10.
35. Park Y, Chung M, Lee MA. Traumatic lumbar hernia: Clinical features and management. *Ann Surg Treat Res.* 2018;95(6):340-344.
36. Sanjay P, Woodward A. Single strenuous event: Does it predispose to inguinal herniation? *Hernia.* 2007;11(6):493-496.
37. Sanyal A, Jefferson PA, Kirby DF. Percutaneous endoscopic gastrostomy button malfunction with severe cough. *Gastrointest Endosc.* 1989;35(2):118-119.
38. Sengar M, Neogi S, Mohta A. Prolapse of the rectum associated with spontaneous rupture of the distal colon and evisceration of the small intestine through the anus in an infant. *J Pediatr Surg.* 2008;43(12):2291-2292.
39. Shutsha E, Brenard R. Hepatic cyst rupture after a coughing fit. *J Hepatol.* 2003;38(6):870.
40. Stillman K, Kellar J. Rectus sheath hematoma: An unfortunate consequence of novel anticoagulants. *West J Emerg Med.* 2015;16(3):420-421.
41. Stupnik T, Vidmar S, Hari P. Spontaneous rupture of a normal spleen following bronchoplastic left lung lower lobectomy. *Interact Cardiovasc Thorac Surg.* 2008;7(2):290-291.
42. Toubia NT, Tawk MM, Potts RM, et al. Cough and spontaneous rupture of a normal spleen. *Chest.* 2005;128(3):1884-1886.
43. Ulla JL, Almohalla C, Ledo L, et al. Coughing attacks as a cause of gastric hemorrhage in patients who have undergone percutaneous endoscopic gastrostomy: An endoscopic solution. *Endoscopy.* 2001;33(9):821.
44. Vasquez JC, Halasz NA, Chu P. Traumatic abdominal wall hernia caused by persistent cough. *South Med J.* 1999;92(9):907-908.
45. Wehbe E, Raffi S, Osborne D. Spontaneous splenic rupture precipitated by cough: A case report and a review of the literature. *Scand J Gastroenterol.* 2008;43(5):634-637.
46. Wergowske GL, Carmody TJ. Splenic rupture from coughing. *Arch Surg.* 1983;118(10):1227.
47. Won AC, Ethell A. Spontaneous splenic rupture resulted from infectious mononucleosis. *Int J Surg Case Rep.* 2012;3(3):97-99.
48. Wurm Johansson G, Nemeth A, Nielsen J, et al. Gastric rupture as a rare complication in diagnostic upper gastrointestinal endoscopy. *Endoscopy.* 2013;45 Suppl 2 UCTN:E391.
49. Weaver DH, Maxwell JG, Castleton KB. Mallory-weiss syndrome. *Am J Surg.* 1969;118(6):887-892.
50. Ben Safta Y, Ghalleb M, Baccari A, et al. Vaginal cuff dehiscence and evisceration 11 years after a radical hysterectomy: A case report. *Int J Surg Case Rep.* 2017;41:234-237.
51. Lee YJ, Chiang YF, Tsai JC. Severe nonproductive cough and cough-induced stress urinary incontinence in diabetic postmenopausal women treated with ace inhibitor. *Diabetes Care.* 2000;23(3):427-428.

52. Reichman G, De Boe V, Braeckman J, et al. Urinary incontinence in patients with cystic fibrosis. *Scand J Urol*. 2016;50(2):128-131.
53. Swenson CW, Kolenic GE, Trowbridge ER, et al. Obesity and stress urinary incontinence in women: Compromised continence mechanism or excess bladder pressure during cough? *Int Urogynecol J*. 2017;28(9):1377-1385.
54. Abu-Gazala M, Ratnayake A, Abu-Gazala S, et al. An enigma of spontaneous combined transdiaphragmatic, intercostal and abdominal wall hernia. *Hernia*. 2013;17(3):415-418.
55. Altman AM, Akers D. Rectus sheath hematoma secondary to a tussive paroxysm. *J La State Med Soc*. 2007;159(5):250-251.
56. Anderton RL. Rectus abdominal muscles pulled by coughing. *JAMA*. 1972;222(4):486.
57. Ayers DE, LeFeuvre A, Barker P. Surgical repair of intercostal pulmonary hernia secondary to cough induced rib fracture. *J R Nav Med Serv*. 2002;88(2):55-56.
58. Bayram B, Oray NC, Acara CA. Old man with groin bruising. *West J Emerg Med*. 2014;15(7):872-873.
59. Begley A, Wilson DS, Shaw J. Cough fracture of the first rib. *Injury*. 1995;26(8):565-566.
60. Bodenheimer JM. Fractured ribs from coughing. *New Orleans Med Surg J*. 1948;100(10):474.
61. Butensky AM, Gruss LP, Gleit ZL. Flank pseudohernia following posterior rib fracture: A case report. *J Med Case Rep*. 2016;10(1):273.
62. Chaar CI, Attanasio P, Detterbeck F. Disruption of the costal margin with transdiaphragmatic abdominal herniation induced by coughing. *Am Surg*. 2008;74(4):350-353.
63. Cherian SV, Ocazonez D, Estrada YMRM. Spontaneous lung hernia secondary to persistent cough: A rare entity. *Arch Bronconeumol*. 2018;54(2):101.
64. Cosgun IG, Unal Y, Cetin M. Rectus sheath hematoma due to cough in an elderly patient under antiplatelet therapy. *Clin Respir J*. 2015;9(2):247-249.
65. Daniel R, Naidu B, Khalil-Marzouk J. Cough-induced rib fracture and diaphragmatic rupture resulting in simultaneous abdominal visceral herniation into the left hemithorax and subcutaneously. *Eur J Cardiothorac Surg*. 2008;34(4):914-915.
66. De Luca G, Martucci N, La Rocca A, et al. Lung herniation: An unusual cause. *European Journal of Cardio-thoracic Surgery*. 2015;48(4):634-635.
67. De Maeseneer M, De Mey J, Debaere C, et al. Rib fractures induced by coughing: An unusual cause of acute chest pain. *Am J Emerg Med*. 2000;18(2):194-197.
68. Dean NC, Van Boerum DH, Liou TG. Rib plating of acute and sub-acute non-union rib fractures in an adult with cystic fibrosis: A case report. *BMC Res Notes*. 2014;7:681.
69. Dearlove OR, Bowen J. Air emphysema in the neck after excision of a thyroglossal cyst. *Anaesthesia*. 2004;59(2):193-194.
70. Elango K, Murthi S, Devasahayam J, et al. Spontaneous rectus sheath haematoma due to cough on apixaban. *BMJ Case Rep*. 2018;2018.
71. Fein BT. Repeated multiple fractures of ribs by cough in bronchial asthma. *J Allergy*. 1958;29(3):209-213.
72. Franco M, Albano L, Blaimont A, et al. Spontaneous fracture of the lower angle of scapula. Possible role of cough. *Joint Bone Spine*. 2004;71(6):580-582.
73. George L, Rehman SU, Khan FA. Diaphragmatic rupture: A complication of violent cough. *Chest*. 2000;117(4):1200-1201.
74. Gradwohl JR, Mailliard JA. Cough induced avulsion of the lesser trochanter. *Nebr Med J*. 1987;72(8):280-281.
75. Habib A, Elsayed H, Dhanji AR, et al. Spontaneous combined lung and bowel hernia following an episode of acute bronchitis. *Interact Cardiovasc Thorac Surg*. 2010;10(6):1042-1043.
76. Han YM, Yoo JH, Suh JS. Sonographic appearance of a tear of the lateral internal oblique muscle resulting from cough. *J Clin Ultrasound*. 2005;33(9):471-473.
77. Heckman AJ, Mohseni M, Villanueva A, et al. Concurrent spontaneous pneumomediastinum and pneumorrhachis. *J Emerg Med*. 2018;54(6):e117-e120.



78. Hillenbrand A, Henne-Bruns D, Wurl P. Cough induced rib fracture, rupture of the diaphragm and abdominal herniation. *World J Emerg Surg.* 2006;1:34.
79. Hillman KM. Severe coughing and pneumoperitoneum. *Br Med J (Clin Res Ed).* 1982;285(6348):1085.
80. Hjalmarsson S, Asmundsson T, Sigurdsson J, et al. Major hemorrhage as a complication of cough fracture. *Chest.* 1993;104(4):1310.
81. Jabr FI, Skeik N. Spontaneous lateral abdominal wall hematoma complicating chronic obstructive pulmonary disease exacerbation. *J Med Liban.* 2011;59(3):160-161.
82. Jang JY, Lim YS, Woo JH, et al. Spontaneous rupture of intercostal artery after severe cough. *Am J Emerg Med.* 2015;33(1):131 e131-133.
83. Kallay N, Crim L, Dunagan DP, et al. Massive left diaphragmatic separation and rupture due to coughing during an asthma exacerbation. *South Med J.* 2000;93(7):729-731.
84. Karabulut Z, Dogan P. Conservative management of spontaneous retroperitoneal bleeding after severe coughing. *Turk J Gastroenterol.* 2014;25(6):733-734.
85. Katrancioglu O, Akkas Y, Arslan S, et al. Spontaneous rib fractures. *Asian Cardiovasc Thorac Ann.* 2015;23(6):701-703.
86. Kawahara H, Baba H, Wada M, et al. Multiple rib fractures associated with severe coughing--a case report. *Int Orthop.* 1997;21(4):279-281.
87. Khan AS, Bakhshi GD, Khan AA, et al. Transdiaphragmatic intercostal hernia due to chronic cough. *Indian J Gastroenterol.* 2006;25(2):92-93.
88. Kodama K, Takase Y, Yamamoto H, et al. Cough-induced internal oblique hematoma. *J Emerg Trauma Shock.* 2013;6(2):132-134.
89. Kopcsanyi I, Laczay A, Nagy L. Cough fracture of ribs in infants with dyspnoea. *Acta Paediatr Acad Sci Hung.* 1969;10(2):93-98.
90. Kosalka J, Wawrzycka-Adamczyk K, Jurkiewicz P, et al. Cough-induced lung intercostal hernia. *Pneumonol Alergol Pol.* 2016;84(2):119-120.
91. Kuczkowski KM, Benumof JL. Postoperative cough-induced recurrence of spinal anaesthesia in the parturient. *Anaesthesia.* 2003;58(1):101.
92. Laitinen H, Kivikanervo K, Vareniskanen M. Coughing osteophytes of the ribs. *Ann Med Intern Fenn.* 1954;43(4):293-297.
93. Litch JA, Tuggy M. Cough induced stress fracture and arthropathy of the ribs at extreme altitude. *Int J Sports Med.* 1998;19(3):220-222.
94. Long AE. Stress fracture of the ribs associated with pregnancy. *Surg Clin North Am.* 1962;42:909-919.
95. Lorin MI, Slovis TL, Haller JO. Fracture of ribs in psychogenic cough. *N Y State J Med.* 1978;78(13):2078-2079.
96. Ma HR, Yang YH, Chiang BL. Clinical observation between chronic sustained cough with asthma and childhood inguinal hernia. *J Microbiol Immunol Infect.* 2003;36(4):275-277.
97. Macedo AC, Kay FU, Terra RM, et al. Transdiaphragmatic intercostal hernia: Imaging aspects in three cases. *J Bras Pneumol.* 2013;39(4):513-517.
98. Macias-Robles MD, Peliz MG, Gonzalez-Ordóñez AJ. Prophylaxis with enoxaparin can produce a giant abdominal wall haematoma when associated with low doses of aspirin among elderly patients suffering cough attacks. *Blood Coagul Fibrinolysis.* 2005;16(3):217-219.
99. Nakanishi H, Iwasaki S, Ohkawa Y, et al. Diaphragmatic rupture due to violent cough during tracheostomy. *Auris Nasus Larynx.* 2010;37(1):121-124.
100. Maqsood U, Ganaie MB, Hasan MI, et al. Unusual case of bilateral haemotympanum after endobronchial ultrasound-guided transbronchial fine needle aspiration (ebus-tbna). *BMJ Case Rep.* 2018;2018.
101. Mary Parks R, Jadoon M, Duffy J. Nontraumatic rupture of the costal margin: A single-center experience. *Asian Cardiovasc Thorac Ann.* 2019;27(2):105-109.
102. Migeot M, Kessler R, Etxeberría Izal A, et al. Pneumorrhachis associated with a spontaneous pneumomediastinum. *Rev Neurol (Paris).* 2013;169(2):173-174.

103. Musher DM, Keitel WA. Severe paroxysmal coughing and pleuritic pain in an adult. *Hosp Pract (1995)*. 1995;30(12):65-67.
104. Nelwan EJ, Angelina F, Adiwinata R, et al. Spontaneous rectus sheath hematomas in dengue hemorrhagic fever: A case report. *IDCases*. 2017;10:35-37.
105. Oostendorp SEV, Buijsman R, Zuidema WP. Cough-induced nonunion rib fractures and herniation: Surgical repair and review. *Asian Cardiovasc Thorac Ann*. 2018;26(5):416-418.
106. Oren V, Kozenitzky I, Babiacki A, et al. Unusual cough related stress injuries. *Eur J Nucl Med*. 1988;14(2):108-111.
107. O'Shea M, Cleasby M. Images in clinical medicine. Lung herniation after cough-induced rupture of intercostal muscle. *N Engl J Med*. 2012;366(1):74.
108. Ozlu MF, Ayhan SS, Ozturk S, et al. Abdominal wall hematoma related to severe cough in a patient under antiaggregant and anticoagulant therapy. *Intern Emerg Med*. 2012;7 Suppl 2:S157-158.
109. Papanikitas J, Sutcliffe RP, Rohatgi A, et al. Bilateral retrovascular femoral hernia. *Ann R Coll Surg Engl*. 2008;90(5):423-424.
110. Pareja Lopez A, Martin Esteve IM, Alvarez Garcia AF. Intercostal bleeding due to persistent cough in a case of acute exacerbation of copd. Selective treatment by arterial embolization. *Med Clin (Barc)*. 2017;148(8):384-385.
111. Patel S, Thyagarajan B, Lalani I. Spontaneous rectus sheath haematoma secondary to severe coughing in a patient with no other precipitating factors. *BMJ Case Rep*. 2016;2016.
112. Paulley JW, Lees DH, Pearson AC. Cough fracture in late pregnancy. *Br Med J*. 1949;1(4594):135-137.
113. Prasad S, Baur LA. Fracture of the first rib as a consequence of pertussis infection. *J Paediatr Child Health*. 2001;37(1):91-93.
114. Reper P, Knafel M, Faraoni D, et al. Cough-induced rupture of the right diaphragm and abdominal herniation. *Intensive Care Med*. 2012;38(7):1237-1238.
115. Roberge RJ, Morgenstern MJ, Osborn H. Cough fracture of the ribs. *Am J Emerg Med*. 1984;2(6):513-517.
116. Rogers FB, Leavitt BJ, Jensen PE. Traumatic transdiaphragmatic intercostal hernia secondary to coughing: Case report and review of the literature. *J Trauma*. 1996;41(5):902-903.
117. Sala C, Bonaldi M, Mariani P, et al. Right post-traumatic diaphragmatic hernia with liver and intestinal dislocation. *J Surg Case Rep*. 2017;2017(3):rjw220.
118. Sano A, Tashiro K, Fukuda T. Cough-induced rib fractures. *Asian Cardiovasc Thorac Ann*. 2015;23(8):958-960.
119. Sternfeld M, Hay E, Eliraz A. Postnasal drip causing multiple cough fractures. *Ann Emerg Med*. 1992;21(5):587.
120. Warmington WT. Four cases of cough fracture. *Ulster Med J*. 1966;35(1):72-74.
121. Yeh CF, Su SC. Cough-induced rib fracture in a young healthy man. *J Formos Med Assoc*. 2012;111(3):179-180.
122. Yu WY, Wang CP, Ng KC, et al. Successful embolization of a ruptured intercostal artery after violent coughing. *Am J Emerg Med*. 2006;24(2):247-249.
123. Aaronson DW, Rovner RN, Patterson R. Cough syncope: Case presentation and review. *J Allergy*. 1970;46(6):359-363.
124. Ariturk Z, Alici H, Cakici M, et al. A rare cause of syncope: Cough. *Eur Rev Med Pharmacol Sci*. 2012;16 Suppl 1:71-72.
125. Awad J, Schiller O. Cough syncope with herpetic tracheobronchitis. *Isr Med Assoc J*. 2001;3(4):284-285.
126. Bahra A, Goadsby PJ. Cough headache responsive to methysergide. *Cephalalgia*. 1998;18(7):495-496.
127. Benditt DG, Samniah N, Pham S, et al. Effect of cough on heart rate and blood pressure in patients with "cough syncope". *Heart Rhythm*. 2005;2(8):807-813.

128. Berciano J, Poca MA, Garcia A, et al. Paroxysmal cervicobrachial cough-induced pain in a patient with syringomyelia extending into spinal cord posterior gray horns. *J Neurol*. 2007;254(5):678-681.
129. Buzzi MG, Formisano R, Colonnese C, et al. Chiari-associated exertional, cough, and sneeze headache responsive to medical therapy. *Headache*. 2003;43(4):404-406.
130. Chadda KD, Peters R, Bloomfield B, et al. Cough syncope treated with a long-term vasoconstrictor. *JAMA*. 1986;255(10):1289-1291.
131. Chen CT, Lin JC, Chang SY. Cough syncope induced by paraspinal abscess. *Am J Med Sci*. 2014;347(1):86-87.
132. Cordenier A, De Hertogh W, De Keyser J, et al. Headache associated with cough: A review. *J Headache Pain*. 2013;14:42.
133. Derbes VJ, Kerr A, Jr. After-cough fainting as a complication of bronchial asthma. *South Med J*. 1953;46(7):701-707.
134. Dickinson O, Nijjar PS, Detloff BL, et al. Vasodepressor cough syncope masked by sleep apnea-induced asystole. *J Cardiovasc Electrophysiol*. 2012;23(9):1024-1027.
135. Enamorado JE, Witsch J, Aviles AH, et al. Neurological picture. Acute appearance of a carotid pseudoaneurysm during coughing. *J Neurol Neurosurg Psychiatry*. 2015;86(1):120.
136. Ertsey C, Jelencsik I. Cough headache associated with chiari type-i malformation: Responsiveness to indomethacin. *Cephalalgia*. 2000;20(5):518-520.
137. Fitzsimons MG. Case report: Cough syncope in a u.S. Army aviator. *Aviat Space Environ Med*. 1998;69(5):515-516.
138. Gelisse P, Genton P. Cough syncope misinterpreted as epileptic seizure. *Epileptic Disord*. 2008;10(3):223-224.
139. Gupta VK. Ocular compression maneuver aborts benign cough-induced headache. *Headache*. 2005;45(5):612-614.
140. Haslam RH, Freigang B. Cough syncope mimicking epilepsy in asthmatic children. *Can J Neurol Sci*. 1985;12(1):45-47.
141. Ireland PD, Mickelsen D, Rodenhouse TG, et al. Evaluation of the autonomic cardiovascular response in arnold-chiari deformities and cough syncope syndrome. *Arch Neurol*. 1996;53(6):526-531.
142. Ishizuka S, Yanai M, Yamaya M, et al. Cough syncope treated with imidapril in an elderly patient with dysphagia. *Chest*. 2000;118(1):279.
143. Jenkins P, Clarke SW. Cough syncope: A complication of adult whooping cough. *Br J Dis Chest*. 1981;75(3):311-313.
144. Katz RM. Cough syncope in children with asthma. *J Pediatr*. 1970;77(1):48-51.
145. Kau T, Rabitsch E, Celedin S, et al. When coughing can cause stroke--a case-based update on cerebral air embolism complicating biopsy of the lung. *Cardiovasc Intervent Radiol*. 2008;31(5):848-853.
146. Kerr A, Jr., Eich RH. Cerebral concussion as a cause of cough syncope. *Arch Intern Med*. 1961;108:248-252.
147. Krediet CT, Wieling W. Edward p. Sharpey-schafer was right: Evidence for systemic vasodilatation as a mechanism of hypotension in cough syncope. *Europace*. 2008;10(4):486-488.
148. Kreitmann L, Collet F, Gouello JP, et al. Cough syncope and multiple pulmonary nodules. *Intern Emerg Med*. 2011;6(4):377-379.
149. Kusuyama T, Iida H, Kino N, et al. Cough syncope induced by gastroesophageal reflux disease. *J Cardiol*. 2009;54(2):300-303.
150. Lin YH, Chen SY, Liu KL, et al. Queer consequence of cough: Atrial myxoma embolization with acute occlusion of the abdominal aorta. *Am J Emerg Med*. 2010;28(2):261 e261-262.
151. Lindegaard KF, Skalpe IO, Sjaastad O. Cough syncope: The possible relation to hydrocephalus ex vacuo. *Eur Neurol*. 1977;15(6):340-344.
152. Linzer M, McFarland TA, Belkin M, et al. Critical carotid and vertebral arterial occlusive disease and cough syncope. *Stroke*. 1992;23(7):1017-1020.

153. Mahawish K. Cough-induced hemiparesis: An unusual manifestation of cord compression. *BMJ Case Rep.* 2016;2016.
154. Marinella MA. A car crash complicating influenza. *Mayo Clin Proc.* 2004;79(8):1087-1088.
155. Mattle HP, Nirikko AC, Baumgartner RW, et al. Transient cerebral circulatory arrest coincides with fainting in cough syncope. *Neurology.* 1995;45(3 Pt 1):498-501.
156. Maznyczka A, Squire IB. Cough syncope--a diagnosis under pressure. *Lancet.* 2010;376(9739):486.
157. McCorry DJ, Chadwick DW, Barber P, et al. Cough syncope in heavy goods vehicle drivers. *QJM.* 2004;97(9):631-632.
158. McIntosh HD, Estes EH, Warren JV. The mechanism of cough syncope. *Am Heart J.* 1956;52(1):70-82.
159. Moncada E, Graff-Radford SB. Cough headache presenting as a toothache: A case report. *Headache.* 1993;33(5):240-243.
160. Mereu R, Taraborrelli P, Sau A, et al. Diagnostic role of head-up tilt test in patients with cough syncope. *Europace.* 2016;18(8):1273-1279.
161. Nomura M, Kannuki S, Kuwayama K, et al. A patient with wallenberg's syndrome induced by severe cough. *J Clin Neurosci.* 2004;11(2):179-182.
162. Ozge C, Atis S, Ozge A, et al. Cough headache: Frequency, characteristics and the relationship with the characteristics of cough. *Eur J Pain.* 2005;9(4):383-388.
163. O'Doherty DS. Tussive syncope and its relation to epilepsy. *Neurology.* 1953;3(1):16-21.
164. Oertel MF, Korinth MC, Reinges MH, et al. Pneumorrhachis of the entire spinal canal. *J Neurol Neurosurg Psychiatry.* 2005;76(7):1036.
165. Pascual J, Gonzalez-Mandly A, Martin R, et al. Headaches precipitated by cough, prolonged exercise or sexual activity: A prospective etiological and clinical study. *J Headache Pain.* 2008;9(5):259-266.
166. Pascual J, Iglesias F, Oterino A, et al. Cough, exertional, and sexual headaches: An analysis of 72 benign and symptomatic cases. *Neurology.* 1996;46(6):1520-1524.
167. Pavao Martins I, Viana P. "Cough hemicrania" - an overlapping form of headache: Case reports. *Headache.* 2017;57(5):796-800.
168. Perini F, Toso V. Benign cough "cluster" headache. *Cephalalgia.* 1998;18(7):493-494.
169. Peters JT. Tussive unconsciousness. *J La State Med Soc.* 1961;113:6-8.
170. Puetz TR, Vakil N. Gastroesophageal reflux-induced cough syncope. *Am J Gastroenterol.* 1995;90(12):2204-2206.
171. Rao DS, Infeld MD, Stern RC, et al. Cough-induced hemiplegic migraine with impaired consciousness in cystic fibrosis. *Pediatr Pulmonol.* 2006;41(2):171-176.
172. Salameh A, Klein M, Klein N, et al. Coughing into the darkness. *Lancet.* 2011;377(9778):1718.
173. Sandford B, Naylor AR. At the back of my mind. *Eur J Vasc Endovasc Surg.* 2015;49(6):660.
174. Sansur CA, Heiss JD, DeVroom HL, et al. Pathophysiology of headache associated with cough in patients with chiari i malformation. *J Neurosurg.* 2003;98(3):453-458.
175. Siclari F, Hirt L, Meuli R, et al. Bilateral carotid thrombus formation after strenuous coughing. *Eur J Neurol.* 2009;16(7):e122-123.
176. Smith WS, Messing RO. Cerebral aneurysm presenting as cough headache. *Headache.* 1993;33(4):203-204.
177. Stern RC, Horwitz SJ, Doershuk CF. Neurologic symptoms during coughing paroxysms in cystic fibrosis. *J Pediatr.* 1988;112(6):909-912.
178. Strauss MJ, Longstreth WT, Jr., Thiele BL. Atypical cough syncope. *JAMA.* 1984;251(13):1731.
179. Styczynski G, Dobosiewicz A, Abramczyk P, et al. Internal jugular vein valve insufficiency in cough syncope. *Neurology.* 2008;70(10):812-813.
180. Symonds C. Cough headache. *Brain.* 1956;79(4):557-568.
181. Takazawa T, Ikeda K, Kano O, et al. A case of sinus arrest and post-hiccup cough syncope in medullary infarction. *J Stroke Cerebrovasc Dis.* 2014;23(3):566-571.

182. Tanaka T, Inoue H, Aizawa H, et al. Case of cough syncope with seizure. *Respiration*. 1994;61(1):48-50.
183. Torrington KG, Adornato BT. Cough radiculopathy--another cause of pain in the neck. *West J Med*. 1984;141(3):379-380.
184. Tsai S, Baig MS, Abrantes-Pais F, et al. Cough-induced transient ischemic attack treated with revascularization of the external carotid artery. *J Vasc Surg*. 2014;60(6):1657-1660.
185. Tsuji H, Takazakura E, Terada Y, et al. Ct demonstration of spinal epidural emphysema complicating bronchial asthma and violent coughing. *J Comput Assist Tomogr*. 1989;13(1):38-39.
186. Ulyatt DB, Judson JA, Trubuhovich RV, et al. Cerebral arterial air embolism associated with coughing on a continuous positive airway pressure circuit. *Crit Care Med*. 1991;19(7):985-987.
187. Vincent JL, Pinsky MR. Cough-induced syncope. *Intensive Care Med*. 1988;14(6):591-594.
188. Viticchi G, Falsetti L, Baruffaldi R, et al. Acute carotid dissection in an adult caused by pertussis. *J Stroke Cerebrovasc Dis*. 2013;22(8):e635-636.
189. Waldmann V, Combes N, Narayanan K, et al. Cough syncope. *Am J Med*. 2017;130(7):e295-e296.
190. Williams B. Cough headache due to craniospinal pressure dissociation. *Arch Neurol*. 1980;37(4):226-230.
191. Wolman L. Cerebral damage in whooping-cough. *Br Med J*. 1962;2(5307):775-776.
192. Yagi T, Koizumi Y. 3d analysis of cough-induced nystagmus in a patient with superior semicircular canal dehiscence. *Auris Nasus Larynx*. 2009;36(5):590-593.
193. Zeng W, Deng H. Cough syncope: Constrictive pericarditis. *Intern Med*. 2013;52(4):463-465.
194. Castelnovo P, Mauri S, Bignami M. Spontaneous compressive orbital emphysema of rhinogenic origin. *Eur Arch Otorhinolaryngol*. 2000;257(10):533-536.
195. Fajgenbaum MAP, Antonakis SN, Membrey L, et al. Acute retinal detachment induced by the valsalva manoeuvre in morning glory disc anomaly. *BMJ Case Rep*. 2018;2018.
196. Kashani S, Aslam SA, Bessant D. Valsalva retinopathy presenting with subhyaloid haemorrhage. *Emerg Med J*. 2009;26(1):74.
197. Kwong S, Daniel A, Kalra S, et al. Transient cough-induced blindness in temporal arteritis. *Neurology*. 2006;67(8):1520.
198. Marimuthu LM, Ranjan R, Chandrasekaran V, et al. Sub-conjunctival hemorrhage following a bout of cough: A harbinger of underlying bleeding diathesis. *Indian J Pediatr*. 2017;84(10):804-805.
199. Marous CL, Sioufi K, Shields CL, et al. Coughing-induced suprachoroidal hemorrhage simulating melanoma in two cases. *Retin Cases Brief Rep*. 2018;12(4):336-341.
200. Reid JM, Williams D. Panda sign due to severe coughing. *J R Coll Physicians Edinb*. 2013;43(1):35.
201. Rieger G. A rare cause of complete "spectacle hematoma". *Ger J Ophthalmol*. 1996;5(6):415-416.
202. Shaikh A, Ahmado A, James B. Severe cough: A cause of late bleb leak. *J Glaucoma*. 2003;12(2):181-183.
203. Romano P. On coughing and the open eye. *Ophthalmic Surg*. 1983;14(12):1041-1042.
204. Braidó F, Baiardini I, Tarantini F, et al. Chronic cough and qol in allergic and respiratory diseases measured by a new specific validated tool-cciq. *J Investig Allergol Clin Immunol*. 2006;16(2):110-116.
205. Deslee G, Burgel PR, Escamilla R, et al. Impact of current cough on health-related quality of life in patients with copd. *Int J Chron Obstruct Pulmon Dis*. 2016;11:2091-2097.
206. French CL, Crawford SL, Bova C, et al. Change in psychological, physiological, and situational factors in adults after treatment of chronic cough. *Chest*. 2017;152(3):547-562.
207. French CL, Irwin RS, Curley FJ, et al. Impact of chronic cough on quality of life. *Arch Intern Med*. 1998;158(15):1657-1661.
208. Glaspole IN, Chapman SA, Cooper WA, et al. Health-related quality of life in idiopathic pulmonary fibrosis: Data from the australian ipf registry. *Respirology*. 2017;22(5):950-956.
209. Hrisanfow E, Hagglund D. Impact of cough and urinary incontinence on quality of life in women and men with chronic obstructive pulmonary disease. *J Clin Nurs*. 2013;22(1-2):97-105.
210. Newcombe PA, Sheffield JK, Petsky HL, et al. A child chronic cough-specific quality of life measure: Development and validation. *Thorax*. 2016;71(8):695-700.

211. Petsios KT, Priftis KN, Tsoumakas C, et al. Cough affects quality of life in asthmatic children aged 8-14 more than other asthma symptoms. *Allergol Immunopathol (Madr)*. 2009;37(2):80-88.
212. Shirai T, Mikamo M, Shishido Y, et al. Impaired cough-related quality of life in patients with controlled asthma with gastroesophageal reflux disease. *Ann Allergy Asthma Immunol*. 2012;108(5):379-380.
213. Tashkin DP, Volkmann ER, Tseng CH, et al. Improved cough and cough-specific quality of life in patients treated for scleroderma-related interstitial lung disease: Results of scleroderma lung study ii. *Chest*. 2017;151(4):813-820.
214. Alves GR, Silva RV, Correa JR, et al. Spontaneous pneumomediastinum (hamman's syndrome). *J Bras Pneumol*. 2012;38(3):404-407.
215. Asenjo M, Angelina M. Images in clinical medicine. Lung herniation with coughing. *N Engl J Med*. 2015;372(5):464.
216. Benedict EB. Rupture of the bronchus from bronchoscopy during a paroxysm of coughing. *JAMA*. 1961;178:509-510.
217. Bilir O, Yavasi O, Ersunan G, et al. Pneumomediastinum associated with pneumopericardium and epidural pneumatosis. *Case Rep Emerg Med*. 2014;2014:275490.
218. Bundy JT, Pontier PJ. Cough-induced hydrothorax in peritoneal dialysis. *Perit Dial Int*. 1994;14(3):293.
219. Candas F, Yildizhan A, Gorur R, et al. Is bilateral chylothorax possible after simple cough? Yes. *Asian Cardiovasc Thorac Ann*. 2015;23(4):471-473.
220. Chiba Y, Kakuta H. Massive subcutaneous emphysema, pneumomediastinum, and spinal epidural emphysema as complications of violent coughing: A case report. *Auris Nasus Larynx*. 1995;22(3):205-208.
221. Cho R, Zamora F, Dincer HE. Anteromedial arytenoid subluxation due to severe cough. *J Bronchology Interv Pulmonol*. 2018;25(1):57-59.
222. Chua TC, Brown KM, Yan TD. Sinister cause of abdominal wall bruising. *ANZ J Surg*. 2015;85(7-8):588-589.
223. Franco AI, Arponen S, Hermoso F, et al. Subcutaneous emphysema, pneumothorax and pneumomediastinum as a complication of an asthma attack. *Indian J Radiol Imaging*. 2019;29(1):77-80.
224. Hamid M, Ghani AR, Ullah W, et al. Spontaneous lung herniation leading to extensive subcutaneous emphysema, pneumothorax, pneumomediastinum, and pneumopericardium. *Cureus*. 2018;10(6):e2861.
225. Irwin RS, Ownbey R, Cagle PT, et al. Interpreting the histopathology of chronic cough: A prospective, controlled, comparative study. *Chest*. 2006;130(2):362-370.
226. Irwin RS, Rosen MJ, Braman SS. Cough. A comprehensive review. *Arch Intern Med*. 1977;137(9):1186-1191.
227. Kao P, Fang HY, Lu TY, et al. Strangulation of chronic transdiaphragmatic intercostal hernia. *Ann Thorac Surg*. 2014;97(6):e155-157.
228. Kara E, Kaya Y, Zeybek R, et al. A case of a diaphragmatic rupture complicated with lacerations of stomach and spleen caused by a violent cough presenting with mediastinal shift. *Ann Acad Med Singapore*. 2004;33(5):649-650.
229. Khayer BL. Simple cough as a cause of subcutaneous emphysema. *BMJ Case Rep*. 2014;2014.
230. Mao A, Kammen BF. Dynamic cervical lung herniation in a 10-year-old girl with cough. *Pediatr Radiol*. 2007;37(10):1058.
231. Park SJ, Park JY, Jung J, et al. Clinical manifestations of spontaneous pneumomediastinum. *Korean J Thorac Cardiovasc Surg*. 2016;49(4):287-291.
232. Patolia S, Zahir M, Schmidt F, et al. Bilateral pneumothorax after bronchoscopy without biopsy--a rare complication: Case presentation and literature review. *J Bronchology Interv Pulmonol*. 2012;19(1):57-60.
233. Roe PF, Kulkarni BN. Pneumomediastinum in children with cough. *Br J Dis Chest*. 1967;61(3):147-150.

234. Rousie C, Van Damme H, Radermecker MA, et al. Spontaneous tracheal rupture: A case report. *Acta Chir Belg.* 2004;104(2):204-208.
235. Rivara CB, Chevrolet JC, Gasche Y, et al. Fatal brain gas embolism during non-invasive positive pressure ventilation. *BMJ Case Rep.* 2008;2008:bcr0620080163.
236. Roh JL, Lee JH. Spontaneous tracheal rupture after severe coughing in a 7-year-old boy. *Pediatrics.* 2006;118(1):e224-227.
237. Rydell JR, Jennings WK. Emergency cervical mediastinotomy for massive mediastinal emphysema. *AMA Arch Surg.* 1955;70(5):647-653.
238. Sayhan M, Orak M, Ustundag M. Posttussive pneumomediastinum. *Lung.* 2008;186(6):351.
239. Sheka KP, Williams LG. Spontaneous intercostal lung hernia. *J Natl Med Assoc.* 1984;76(12):1210, 1212-1213.
240. Sloth-Nielsen J, Jurik AG. Spontaneous intercostal pulmonary hernia with subsegmental incarceration. *Eur J Cardiothorac Surg.* 1989;3(6):562-564.
241. Sulaiman A, Cottin V, De Souza Neto EP, et al. Cough-induced intercostal lung herniation requiring surgery: Report of a case. *Surg Today.* 2006;36(11):978-980.
242. Tack D, Wattiez A, Schtickzelle JC, et al. Spontaneous lung herniation after a single cough. *Eur Radiol.* 2000;10(3):500-502.
243. Wang H, Nugent WC. Cough-induced bilateral spontaneous pneumothorax. *Ann Thorac Surg.* 2010;90(4):1363-1365.
244. Young S, Bitsakou H, Caric D, et al. Coughing can relieve or exacerbate symptoms in asthmatic patients. *Respir Med.* 1991;85 Suppl A:7-12.
245. Field SK, Escalante P, Fisher DA, et al. Cough due to tb and other chronic infections: Chest guideline and expert panel report. *Chest.* 2018;153(2):467-497.
246. Lindsley WG, Pearce TA, Hudnall JB, et al. Quantity and size distribution of cough-generated aerosol particles produced by influenza patients during and after illness. *J Occup Environ Hyg.* 2012;9(7):443-449.
247. Wang Y, Shao F, Zhang L, et al. Increased 18f-fdg uptake in multiple muscles in a patient with violent cough. *Clin Nucl Med.* 2017;42(6):451-453.
